# Supplementary material for: In-Motion-App for remote General Movement Assessment: a multi-site observational study
Source: PubMed Central journal article supplement — BMJ Open. 2021 Mar 4;11(3):e042147. doi: 10.1136/bmjopen-2020-042147 (PMC7934716; doi:10.1136/bmjopen-2020-042147), 2021-03-04
Supplement: bmjopen-2020-042147.draft_revisions.pdf [file bmjopen-2020-042147.draft_revisions.pdf]

# BMJ Open

BMJ Open is committed to open peer review. As part of this commitment we make the peer review history of every article we publish publicly available.

When an article is published we post the peer reviewers' comments and the authors' responses online. We also post the versions of the paper that were used during peer review. These are the versions that the peer review comments apply to.

The versions of the paper that follow are the versions that were submitted during the peer review process. They are not the versions of record or the final published versions. They should not be cited or distributed as the published version of this manuscript.

BMJ Open is an open access journal and the full, final, typeset and author-corrected version of record of the manuscript is available on our site with no access controls, subscription charges or pay-per-view fees (<http://bmjopen.bmj.com>).

If you have any questions on BMJ Open's open peer review process please email [info.bmjopen@bmj.com](mailto:info.bmjopen@bmj.com)

# BMJ Open

## The In-Motion-App for remote General Movement Assessment: A multi-site observational study.

|                               |                                                                                                                                                                                                                                                                                                                                                                                                                                                                                                                                                                                                                                                                                                                                                                                                                                                                                                                                                                                                                                                                                                                                                                                                                                                                                                                                                                                                                                                                                                                                                                                                                                                                                                                                                       |
|-------------------------------|-------------------------------------------------------------------------------------------------------------------------------------------------------------------------------------------------------------------------------------------------------------------------------------------------------------------------------------------------------------------------------------------------------------------------------------------------------------------------------------------------------------------------------------------------------------------------------------------------------------------------------------------------------------------------------------------------------------------------------------------------------------------------------------------------------------------------------------------------------------------------------------------------------------------------------------------------------------------------------------------------------------------------------------------------------------------------------------------------------------------------------------------------------------------------------------------------------------------------------------------------------------------------------------------------------------------------------------------------------------------------------------------------------------------------------------------------------------------------------------------------------------------------------------------------------------------------------------------------------------------------------------------------------------------------------------------------------------------------------------------------------|
| Journal:                      | <i>BMJ Open</i>                                                                                                                                                                                                                                                                                                                                                                                                                                                                                                                                                                                                                                                                                                                                                                                                                                                                                                                                                                                                                                                                                                                                                                                                                                                                                                                                                                                                                                                                                                                                                                                                                                                                                                                                       |
| Manuscript ID                 | bmjopen-2020-042147                                                                                                                                                                                                                                                                                                                                                                                                                                                                                                                                                                                                                                                                                                                                                                                                                                                                                                                                                                                                                                                                                                                                                                                                                                                                                                                                                                                                                                                                                                                                                                                                                                                                                                                                   |
| Article Type:                 | Original research                                                                                                                                                                                                                                                                                                                                                                                                                                                                                                                                                                                                                                                                                                                                                                                                                                                                                                                                                                                                                                                                                                                                                                                                                                                                                                                                                                                                                                                                                                                                                                                                                                                                                                                                     |
| Date Submitted by the Author: | 26-Jun-2020                                                                                                                                                                                                                                                                                                                                                                                                                                                                                                                                                                                                                                                                                                                                                                                                                                                                                                                                                                                                                                                                                                                                                                                                                                                                                                                                                                                                                                                                                                                                                                                                                                                                                                                                           |
| Complete List of Authors:     | <p>Adde, Lars; Norwegian University of Science and Technology, Department of Clinical and Molecular Medicine ; St Olavs Hospital University Hospital in Trondheim, Clinic of Clinical services</p> <p>Brown, Annemette; Lund University, Department of Health Sciences; Nordsjællands Hospital, Department of Pediatric and Adolescent and Department of Neurology and Physiotherapy</p> <p>van den Broeck, Christine; Ghent University, Department of rehabilitation sciences</p> <p>DeCoen, Kris; University Hospital Ghent, Department of Neonatology</p> <p>Eriksen, Beate; Møre og Romsdal Hospital Trust, Department of Pediatrics</p> <p>Fjørtoft, Toril; St Olavs Hospital University Hospital in Trondheim, Clinic of Clinical Services; Norwegian University of Science and Technology, Department of Clinical and Molecular Medicine</p> <p>Groos, Daniel; Norwegian University of Science and Technology, Department of Neuromedicine and Movement Science</p> <p>Ihlen, Espen ; Norwegian University of Science and Technology, Department of Neuromedicine and Movement Science</p> <p>Osland, Siril; St Olavs Hospital University Hospital in Trondheim, Clinic of Clinical Services</p> <p>Pascal, Aurelie ; University of Ghent, Department of rehabilitation sciences</p> <p>Paulsen, Henriette; Vestfold Hospital Trust, Department of Physiotherapy and Rehabilitation</p> <p>Skog, Ole; Vestfold Hospital Trust, Habilitation Center</p> <p>Sivertsen, Wiebke; Møre og Romsdal Hospital Trust, Department of Pediatrics</p> <p>Støen, Ragnhild; Norwegian University of Science and Technology, Department of Clinical and Molecular Medicine; St Olavs Hospital University Hospital in Trondheim, Department of Neonatology</p> |
| Keywords:                     | Paediatric intensive & critical care < INTENSIVE & CRITICAL CARE, Paediatric neurology < NEUROLOGY, Developmental neurology & neurodisability < PAEDIATRICS                                                                                                                                                                                                                                                                                                                                                                                                                                                                                                                                                                                                                                                                                                                                                                                                                                                                                                                                                                                                                                                                                                                                                                                                                                                                                                                                                                                                                                                                                                                                                                                           |
|                               |                                                                                                                                                                                                                                                                                                                                                                                                                                                                                                                                                                                                                                                                                                                                                                                                                                                                                                                                                                                                                                                                                                                                                                                                                                                                                                                                                                                                                                                                                                                                                                                                                                                                                                                                                       |

1  
2  
3  
4  
5  
6  
7  
8  
9  
10  
11  
12  
13  
14  
15  
16  
17  
18  
19  
20  
21  
22  
23  
24  
25  
26  
27  
28  
29  
30  
31  
32  
33  
34  
35  
36  
37  
38  
39  
40  
41  
42  
43  
44  
45  
46  
47  
48  
49  
50  
51  
52  
53  
54  
55  
56  
57  
58  
59  
60

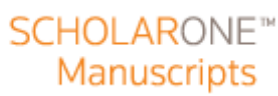

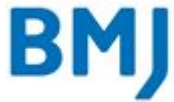

I, the Submitting Author has the right to grant and does grant on behalf of all authors of the Work (as defined in the below author licence), an exclusive licence and/or a non-exclusive licence for contributions from authors who are: i) UK Crown employees; ii) where BMJ has agreed a CC-BY licence shall apply, and/or iii) in accordance with the terms applicable for US Federal Government officers or employees acting as part of their official duties; on a worldwide, perpetual, irrevocable, royalty-free basis to BMJ Publishing Group Ltd ("BMJ") its licensees and where the relevant Journal is co-owned by BMJ to the co-owners of the Journal, to publish the Work in this journal and any other BMJ products and to exploit all rights, as set out in our [licence](#).

The Submitting Author accepts and understands that any supply made under these terms is made by BMJ to the Submitting Author unless you are acting as an employee on behalf of your employer or a postgraduate student of an affiliated institution which is paying any applicable article publishing charge ("APC") for Open Access articles. Where the Submitting Author wishes to make the Work available on an Open Access basis (and intends to pay the relevant APC), the terms of reuse of such Open Access shall be governed by a Creative Commons licence – details of these licences and which [Creative Commons](#) licence will apply to this Work are set out in our licence referred to above.

Other than as permitted in any relevant BMJ Author's Self Archiving Policies, I confirm this Work has not been accepted for publication elsewhere, is not being considered for publication elsewhere and does not duplicate material already published. I confirm all authors consent to publication of this Work and authorise the granting of this licence.

**Title:**

The In-Motion-App for remote General Movement Assessment: A multi-site observational study.

**Authors:**

Lars Adde<sup>1,2</sup>, Annemette Brown<sup>3,4</sup>, Christine van den Broeck<sup>5</sup>, Kris De Coen<sup>6</sup>, Beate Horsberg Eriksen<sup>7</sup>, Toril Fjørtoft<sup>2,1</sup>, Daniel Groos<sup>8</sup>, Espen Ihlen<sup>8</sup>, Siril Osland<sup>2</sup>, Aurelie Pascal<sup>5</sup>, Henriette Paulsen<sup>9</sup>, Ole Morten Skog<sup>10</sup>, Wiebke Sivertsen<sup>7</sup>, Ragnhild Støen<sup>1,11</sup>

<sup>1</sup> Department of Clinical and Molecular Medicine, Norwegian University of Science and Technology, Trondheim, Norway

<sup>2</sup> Clinic of Clinical Services, St. Olavs hospital, Trondheim University Hospital, Trondheim, Norway

<sup>3</sup> Department of Health sciences, Faculty of Medicine, Lund University, Lund, Sweden

<sup>4</sup> Department of Pediatric and Adolescent and Department of Neurology and Physiotherapy, Copenhagen University Hospital, Nordsjællands hospital, Denmark

<sup>5</sup> Department of rehabilitation sciences, Ghent University, Ghent, Belgium

<sup>6</sup> Department of Neonatology, University Hospital Ghent, Ghent, Belgium

<sup>7</sup> Department of Pediatrics, Møre and Romsdal Hospital trust, Ålesund Hospital, Ålesund, Norway

<sup>8</sup> Department of Neuromedicine and Movement Science, Norwegian University of Science and Technology, Trondheim, Norway

<sup>9</sup> Department of Physiotherapy and Rehabilitation, Vestfold Hospital Trust, Tønsberg, Norway

<sup>10</sup> Habilitation Center, Vestfold Hospital Trust, Tønsberg, Norway

<sup>11</sup> Department of Neonatology, St. Olavs hospital, Trondheim University Hospital, Trondheim, Norway

**Correspondence to:**

Lars Adde; [lars.adde@ntnu.no](mailto:lars.adde@ntnu.no)

**Word count:** 3533

## Abstract

**Objectives** To determine whether videos taken by parents of their infants' spontaneous movements were in accordance with required standards in the In-Motion-App, and whether the videos could be remotely scored by a trained General Movement Assessment (GMA) observer. Additionally, to assess the feasibility of using home-based video recordings for automated tracking of spontaneous movements, and to examine parents' perceptions and experiences of taking videos in their homes.

**Design** The study was a multi-center prospective observational study.

**Setting** Parents/families of high-risk infants in tertiary care follow-up programs in Norway, Denmark and Belgium.

**Methods** Parents/families were asked to video record their baby in accordance with the In-Motion standards which were based on published GMA criteria and criteria covering lighting and stability of smartphone. Videos were evaluated as GMA "scorable" or "non-scorable" based on pre-defined criteria. The accuracy of a 7-point body tracker software was compared to manually annotated body key points. Parents were surveyed about the In-Motion-App information and clarity.

**Participants** The sample comprised 86 parents/families of high-risk infants.

**Results** The 86 parent/families returned 130 videos, and 121 (96%) of them were in accordance with the requirements for GMA assessment. The 7-point body tracker software detected more than 80% of body key point positions correctly. Most families found the instructions for filming their baby easy to follow, and more than 90% reported that they did not become more worried about their child's development through using the instructions.

**Conclusions** This study reveals that a short instructional video enabled parents to video record their infant's spontaneous movements in compliance with the standards required for remote GMA. Further, an accurate automated body point software detecting infant body landmarks in smartphone videos will facilitate clinical and research use soon. Home-based video recordings could be performed without worrying parents about their child's development.

## Strengths and limitations of this study

- A cohort of families of high-risk infants frequently seen in NICU follow-up settings.
- In-Motion-App standards for remote General Movement Assessment (GMA) communicated through a simple and short animated video.
- Data from a motion tracking software on smartphone videos pioneering automatic and markerless infant motion capture.
- Study not designed to evaluate reasons for families not recording or returning videos.
- Study did not evaluate how markerless infant motion capture on smartphone videos can be used for prediction of CP outcome.

## 1. INTRODUCTION

Cerebral Palsy (CP) is the most common physical disability in childhood. Diagnosis is typically set between 12- and 24-months corrected age (1-3). Early developmental screening of high-risk infants to predict future neurological impairments is today a priority for clinicians and researchers, and most parents express interest in such neurodevelopmental screening (3, 4).

The General Movement Assessment (GMA) has been recommended in combination with magnetic resonance imaging (MRI) to achieve a CP diagnosis before 6 months corrected age in infants with newborn-detectable risk factors (3). Early detection of CP has the potential to improve the organization and resources used in follow-up screening at hospitals and reduce medical complications for children with CP. The fidgety type of general movements (GMs) observed at 9-20 weeks' corrected age has shown high predictive validity for later CP (5-8). Video recordings for GMA must follow requirements for infant state, position and clothing and are scored by certified and trained assessors (9). Such trained GMA observers also have the expertise needed to ensure that video recordings fulfill the requirements for a valid GMA (9).

Access to trained observers using the GMA in hospital-based follow-up programs is limited by geographical constraints and lack of GMA expertise (10). As health care and parents move into the digital age using smartphones to share videos via internet, opportunities to perform remote GMA have developed. Recently, the Baby Moves smartphone app was presented for remote GMA within research settings (10, 11). However, smartphone apps for health data capturing in clinical settings are rarely assessed and usability tested (12). To be feasible in a clinical follow-up setting, home-based video recordings must fulfill basic GMA requirements without the need for comprehensive parental training or guiding.

Video recordings by hand-held smartphones introduce movement artifacts in the camera. Computer-based methods for objective detection of infant GMs (13, 14) may be jeopardized by such artifacts. Our research group has recently presented a machine-learning model which predicted CP with high accuracy comparable to observational GMA (15). Important shortcomings of the method were the need for manual and time-consuming body point annotations, as well as the need for a stationary camera. Hence, an automated 7-point body tracker has been developed by our group and needs to be validated on recordings taken with hand-held cameras.

Provided that GMs can be assessed, and computer-based infant body point tracking can be performed on videos taken with a hand-held camera, it is possible to perform remote GMA as well as automated infant body point tracking for a computer-based model for the prediction of CP. Thus, the In-Motion instructional video has been developed so that parents can perform home-based videos with quality standards feasible for remote GMA and automated infant body point tracking. Feasibility of the In-Motion instructional video was assessed in a multi-site study including families of high-risk infants from Norway, Denmark and Belgium.

The main aims of the study are as follows: 1) To determine whether videos taken by parents with a hand-held camera were in accordance with the standards set in the instructional video, and whether the videos could be scored by a trained GMA observer. 2) To assess the accuracy of a 7-point body tracker software based on the same recordings. 3) To describe parents' perceptions of the instructional video and filming their baby in a home environment.

## 2. METHODS

### Design

Multi-center prospective observational study.

### **Patient and public involvement**

The study protocol including the parental survey content was developed and designed collaboratively with representatives from The Norwegian Cerebral Palsy organization and The Norwegian Premature Association.

### **Participants**

Parents of infants admitted to one of five participating level III-IV Neonatal Infant Care Units (NICU) in Norway, Denmark and Belgium from 2017-2018 were consecutively recruited at referral to the hospital follow-up program before discharge from the NICU. Families were recruited based on willingness to participate and the infant being evaluated as at high-risk of CP. In Norway and Denmark inclusion criteria were (a) Birth weight (BW)  $\leq 1000$  g (extremely low birth weight (ELBW) and/or gestational age (GA)  $< 28$  (extremely low GA (ELGA)), (b) neonatal arterial ischemic stroke, (c) neonatal encephalopathy, (d) other significant risk factors. In Belgium, only infants with GA  $< 32$  weeks or with perinatal stroke were included.

### **Data collection procedure**

Included participants were assisted by a research physiotherapist/pediatrician to download and install the In-Motion-App containing the instructional video from Google Play or iTunes. They could ask any questions about the app and how to manage the software. They got information about the time window for performing two separate video recordings between  $12^{+1} - 13^{+6}$  and  $14^{+1} - 17^{+6}$  weeks post term age (PTA). The time points were defined to ensure GM videos from the fidgety movement's period. If no videos were returned from the families before  $17^{+6}$  weeks PTA, the local study coordinator contacted the family to ask the reason why they had not uploaded any videos. The app was linked to a secure online server hosted at St. Olavs Hospital in Trondheim, Norway, and was available for i-operating system (iOS) and Android. After the end of the second time window, the families were contacted by email with a link to an online Norwegian University of Science and Technology survey to collect information about their opinions using the app and the In-Motion instructional video.

### **The In-Motion-App and instructional video**

The In-Motion instructional video was designed for parents to give basic insight into recording standards needed for GMA and lighting and stability of camera. It was made as a short animation with simple drawn sequences containing a minimum of text. The instructional video was deployed to the parents by downloading the In-Motion-App developed for this study, and videos could be uploaded to be remotely assessed by a trained GMA observer.

After downloading the app and getting basic information from the local study coordinator, parents logged into the app with a username and a password. They typed in the first name of their child and the expected date of delivery (due date). The In-Motion-App generated two separate time windows between  $12^{+1} - 13^{+6}$  and  $14^{+1} - 17^{+6}$  weeks PTA and visualized them in a graphical timeline to show when videos should be taken. A red dot illustrated today's date placed on the timeline, helping parents to plan when to perform the video recordings. In addition, a pop-up message reminded parents to prepare for videos a week before the beginning of each time window. The In-Motion-App was constructed in such a way that the video recording automatically stopped after 3 minutes and asked the parents whether to upload the video or not.

The instructional video was 2 minutes and 47 seconds long. Before taking videos, parents were told to look through the In-Motion instructional video which was available from the app menu. They could watch the video as many times as they wanted until they felt confident performing the recording. The main themes aimed at ensuring quality standards for remote GMA included: a) clothing of infant, b) surface/underlay for infant, c) lighting, d) state of infant, e) positioning and f) length of video. In addition, instructions were provided about how to keep the smartphone steady and ensure



1  
2  
3 that the whole infant body was observable in the video image. Examples of some of the In-Motion  
4 instructional video themes are shown in Figure 1. Parents were asked to consecutively upload videos  
5 to the server at St. Olavs Hospital in Norway.  
6  
7

### 8 **Assessment of video quality for remote GMA**

9 Videos were assessed by a certified GMA observer with respect to the following standards (9): 1) *GMA*  
10 *standards*: active movements (not hypokinetic), supine position, correct state, adequate clothing  
11 (diaper or a onesie), no disturbances during recording. 2) *Additional In-Motion standards*: adequate  
12 light, whole body visible, feet of parent visible in video (ensuring correct position of smartphone  
13 camera, see picture to the right in Figure 1) and camera stability. Based on these standards, a  
14 classification was made by the same certified GMA observer as either “GMA scorable” if all standard  
15 criteria were fulfilled or “GMA non-scorable” if one or more standard criteria were inadequate. In  
16 addition, it was documented whether the hand-held video had optimal stability, events of abrupt  
17 displacement, was predominantly unstable, whether an adequate underlay was used (firm,  
18 comfortable, large enough) and whether overall video image quality was sufficient (blurred/very  
19 blurred).  
20  
21  
22

### 23 **Assessment of General Movements**

24 All videos classified as “GMA scorable” were consecutively assessed by one certified and experienced  
25 GMA observer that had passed advanced GMs courses under the General Movement Trust (LA). The  
26 observer had no knowledge about the infant’s clinical history. According to Prechtl’s method of  
27 assessment of general movements (9), fidgety movements were classified as continuous (FM++),  
28 intermittent (FM+), sporadic (FM+/-), abnormal (Fa) or absent (FM-).  
29  
30  
31

### 32 **In-Motion body point tracking**

33 A subset of 66 videos (5493 video frames) recorded by the In-Motion-App was used for automatic  
34 infant motion tracking to detect the displacement of 7-body points (nose, thorax (center between  
35 shoulders), wrists, pelvis, and ankles). The infant motion tracker algorithm consists of a  
36 convolutional neural net trained on 14900 video frames on high-risk infants that had participated in  
37 another study from our group (8). For further technical details of the convolutional neural net, the  
38 reader is referred to Groos et al (16). All 7 body points in the videos used in this study were manually  
39 annotated and used as ground truth for automatic body point position evaluation. The performance  
40 of the infant motion tracker is reported as percentage of points within a circular area around the  
41 annotated body point for the 5493 test frames. The size of the circular area was set to 10% of the  
42 infant head size and was normalized to adjust for different scaling (i.e., video zoom) (Figure 3).  
43  
44  
45  
46

### 47 **Survey**

48 Parents’ opinions about the In-Motion-App and instructional video were collected using SelectSurvey  
49 v.4 software (ClassApps Inc., [www.classapps.com](http://www.classapps.com)) in Norway, operated by Norwegian University of  
50 Science and Technology (NTNU). In Denmark, parents’ opinions were collected using Smart Trails data  
51 management software (MEDEI ApS. [www.medei.dk](http://www.medei.dk)) and in Belgium the survey was collected by post.  
52 The survey was sent to the families by a link in an email within one week after the last video was  
53 returned. The survey questions were customised for the In-Motion-App based on a tool developed by  
54 Jin and Kim in 2015 (17) and a survey used in a similar study on the Baby Moves App (11). It contained  
55 questions based on forced-choice questions covering the themes; 1) In-Motion-App, 2) In-Motion  
56 standards for remote GMA and 3) parental worries, where a statement was made and the parents  
57 indicated agreement or disagreement with the statement on a 5-point scale (Appendix S1,  
58 supplementary information).  
59  
60

## Data analysis

Data were analyzed using SPSS statistics version 26.0 (IBM SPSS Statistics, Chicago, IL). The data are presented as numbers with proportion (%) or mean with standard deviation (SD) and range. Differences between infants with returned and no returned videos were analyzed using the Mann-Whitney U Test for continuous variables and Chi-square test and Fisher's Exact test for dichotomous variables. The accuracy of the 7-point body tracker was presented as the distribution of body point detections relative to the manually annotated body points, where 10% of the infant head size was used as a threshold.

## 3. RESULTS

In total, 86 infants/families were recruited and 17 (19.8%) out of them did not submit any video (Figure 2), leaving 69 families with 130 videos for analysis.

Twenty-eight (32.6%) families were included from three different hospitals in Norway, 43 (50%) from one hospital in Copenhagen, Denmark and 15 (17.4%) from one hospital in Gent, Belgium. Infant/family characteristics are shown in table 1.

### 3.1 Video recordings

Two (1.5%) out of 130 videos were shorter than 3 minutes (1 minute and 12 seconds and 2 minutes and 17 seconds). The mean PTA at video recording was 14.5 weeks (SD 2.28, range 8.1-23.6 weeks).

Fifteen (11.7%) families returned one recording, 49 (71%) two recordings, 4 (5.8%) three recordings, and 1 (1.4%) six recordings. One-hundred and seventeen (90%) videos were returned within the expected time window between 12<sup>+1</sup> - 17<sup>+6</sup> weeks PTA. Two (1.5%) families returned 2 and 3 videos, respectively, which were all taken outside the time window (week 8, 10, and 21 and 23, respectively). Eleven families (8.5%) with videos from within the requested time window, had additional videos taken outside the expected time windows. Six videos from one family were taken at two different days; four videos in weeks 12 and two videos in week 14 PTA.

### 3.2 Remote General Movement Assessment

Among the six videos returned from one family, the first one from each of the two days was selected for GMA analysis. Exclusion of the remaining 4 videos and additional 4 videos excluded due to PTA outside of the age required for assessment of FMs gave a total of 122 videos available for quality assessment.

One hundred and twenty-one (99%) out of 122 videos which were returned within the required time window were classified as GMA scorable. The video that was non-scorable had infant in side lying position. Details about compliance to the In-Motion standards are shown in Table 2.

### 3.3 General Movement Assessment

Of the 121 videos classified as GMA scorable, 3 (2.4%) videos were classified with exaggerated (Fa), 3 (2.4%) with absent (FM-), and 7 (5.6%) with sporadic (FM+/-) FMs. Eighty-seven (69%) and 21 (16.7%) videos were classified with intermittent (FM+) and continuous (FM++) FMs, respectively.

### 3.4 Computer-based body point tracking

The proportion of correctly predicted left wrist key point from 5493 tested video images was 83.15%. Details of accuracy of 7 predicted body points and mean value for all points are shown in Figure 3.

### 3.5 Parent responses

Survey responses were received from 64 (92.8%) families of the 69 families who returned at least one video. Fifty-four (84.3%) of them observed the instructional video one or two times before filming their baby. No families returned a video without training on filming their baby first.

The majority of the survey respondents found the In-Motion-App easy to use. All respondents agreed or strongly agreed that it was easy to understand how to stand and hold the smartphone during the filming. Details about family responses are shown in Table 3. Fifty-seven (90.5%) families strongly disagreed, disagreed or neither disagreed nor agreed that they did become more worried about their child's development through using the In-Motion instructions.

## DISCUSSION

In this study, more than 95% of families with high-risk infants filming their baby at home, returned at least one video that was in accordance with the In-Motion standards for remote GMA. Most families found the In-Motion-App easy to use and the instructions for filming easy to follow, and less than 10% of respondents became worried through using the In-Motion-App. Despite the use of hand-held smartphones introducing movement artifacts in the video image, our computer-based 7-point body tracker detected positions of the body points with high accuracy. To the best of our knowledge, this is the first automatic infant body point tracker that is tested on video recordings from hand-held smartphones.

This study has several strengths. First, it included families of high-risk infants frequently seen in NICU follow-up settings. We argue that this makes our findings robust and generalizable to comparable clinical settings. Second, the communication of In-Motion standards through a simple and short animated video, makes the instructions easily applicable to a broad range of different clinical settings. Furthermore, the accuracy of the 7-point body tracker software with the use of smartphone videos makes it pioneering in the field of automatic and markerless infant motion capture compared to other studies (18, 19). This facilitates further development of methods for early automated detection of CP based on smartphone videos. Finally, the design of the study using an experienced and certified GMA observer for evaluation of video quality and a survey with very high response rate, makes the study quality high and the results trustworthy.

There are also several limitations. First, almost 20% of the included families did not return any video. This study was not designed to evaluate reasons for not recording or returning videos. We can, therefore, only conclude on the quality of returned videos. Problems encountered by families who did not record or return any video need to be further explored. Our findings are in accordance with the study by Kwong et al (11), where 24% of families did not return any video using the Baby Moves App. These findings indicate that home-based video recordings for remote GMA is not a solution for all families and that it might be difficult in a clinical setting to know beforehand which families will return a video or not. Furthermore, 13 (19%) families returned one or several videos outside the required time window needed for a valid GMA. More than 90% of respondents found the reminders in the App helpful, but one fifth disagreed that the number of reminders were appropriate. This indicates a limitation in the design of the app reminders to prepare parents for video recordings at the correct time. This needs to be improved in a process involving the users.

Second, our study comprised five different hospital sites in three different countries, and information provided to families when downloading the App may have differed. Additionally, there is a risk that the research personnel could have given more information and assistance to families than will be common in an ordinary clinical setting. Our study setting could therefore be in slight contrast to an ordinary clinical setting, where adapted and flexible family information is needed due to

1  
2  
3 challenges in reduced participation in neurodevelopmental follow-up (20) and racial and  
4 socioeconomic differences in mobile health technology usage (21).  
5

6 Third, even though almost 20% of the hand-held videos in our study were classified as  
7 predominantly unstable, the GMA expert considered the videos to be GMA scorable. There is a risk  
8 that more videos might have been classified as non-scorable by another GMA observer with less  
9 training and experience. To the best of our knowledge, there is only one study protocol planning to  
10 assess the predictive validity of GMA from videos taken with hand-held smartphones for CP outcome  
11 (10). Hence, further studies on the use of smartphones for GMA are needed.  
12

13 Finally, our computer-based 7-point body tracker showed accurate estimations compared to  
14 manual annotations on the video image. However, further studies must explore how selection of body  
15 points, tracked body point accuracy and movement artifacts in camera will influence a machine-  
16 learning model for prediction of CP from smartphone video recordings.  
17

18 This study facilitates and contributes to the use of smartphone technology for video  
19 recordings and remote GMA. Consequently, it will contribute to giving high-risk infants and their  
20 families equal access to GMA as an accurate method for early identification of CP, without  
21 geographical constraints. The use of early remote medical assessment will improve the organization  
22 and resources used in follow-up screening at hospitals and have the potential to reduce medical  
23 complications for children with CP due to early detection. A clinical feasible computer-based  
24 movement analysis with equal accuracy as GMA, will greatly reduce the need for specialized GMA  
25 observers and provide an innovative resource-effective diagnostic measure.  
26  
27

### 28 **Acknowledgements**

29 We would like to thank all the families that participated in this study. We acknowledge the support  
30 from St. Olavs Hospital, The Liaison Committee between the Central Norway Regional Health  
31 Authority and the Norwegian Open AI-Lab, Norwegian University of Science and Technology,  
32 Trondheim, Norway. Thanks also to Mia Ortvad Bjerager consultant neonatologist and the Neonatal  
33 Ward staff at Nordsjællands Hospital in Denmark for their valuable contribution to this study.  
34  
35

### 36 **Contributors**

37 Conceptualization; LA, RS, HP, OMS, TF, SO, WS, BE, CB, Data curation; LA, RS, EI, DG, Formal analysis;  
38 LA, RS, EI, DG, Funding acquisition; LA, RS, Methodology; LA, RS, EI, DG, TF, SO, Project administration;  
39 LA, BE, HP, AP, AB, CB, RS, Resources; LA, TF, SO, AB, AP, HP, OMS, BE, WS, Writing-original draft; LA,  
40 RS, EI, DG, Writing-review & editing; LA, RS, EI, DG, TF, SO, BE, WS, AB, AP, CB, HP, OMS.  
41  
42

### 43 **Funding**

44 This work was supported by grants from St. Olavs Hospital, Trondheim, Norway and The Liaison  
45 Committee between the Central Norway Regional Health Authority and the Norwegian University of  
46 Science and Technology, Trondheim, Norway (SO: 90056100). In Denmark the study was supported  
47 by grants from Nordsjællands Hospital, University Hospital of Copenhagen, Hillerød (PSP E-20231-18-  
48 01).  
49

### 50 **Competing interests**

51 None declared.  
52

### 53 **Patient consent**

54 Obtained in all participants.  
55

### 56 **Ethics approval**

57 All infant/families provided written informed consent and ethics was approved by the regional  
58 committee for medical and health research ethics (REC Central-Committee 2017/913) in Norway. The  
59  
60

1  
2  
3 study sites in Denmark and Belgium also had approvals from their local Institutional Review boards.  
4 Study registration in ClinicalTrials.gov Protocol Record 2017/913.  
5

#### 6 7 **Provenance and peer review**

8 Not commissioned; external peer reviewed.  
9

#### 10 11 **Data availability statement**

12 No data are available. Data from this study are not available for sharing due to ethical approval  
13 requirements. Researchers interested in collaboration should contact the corresponding author with  
14 their expression of interest.  
15

#### 16 17 **Open Access**

18 This is an Open Access article distributed in accordance with the Creative Common Attribution Non-  
19 Commercial (CC BY-NC 4.0) license, which permits others to distribute, remix, adapt, build upon this  
20 work non-commercially, and license their derivative works on different terms, provided the original  
21 work is properly cited and the use is non-commercial. See: <http://creativecommons.org/licenses/by-nc/4.0/>  
22

#### 23 24 **REFERENCES**

- 25 1. Granild-Jensen JB, Rackauskaite G, Flachs EM, Uldall P. Predictors for early diagnosis of  
26 cerebral palsy from national registry data. *Dev Med Child Neurol*. 2015.
- 27 2. Hubermann L, Boychuck Z, Shevell M, Majnemer A. Age at Referral of Children for Initial  
28 Diagnosis of Cerebral Palsy and Rehabilitation: Current Practices. *J Child Neurol*. 2016;31(3):364-9.
- 29 3. Novak I, Morgan C, Adde L, Blackman J, Boyd RN, Brunstrom-Hernandez J, et al. Early,  
30 Accurate Diagnosis and Early Intervention in Cerebral Palsy: Advances in Diagnosis and Treatment.  
31 *JAMA Pediatr*. 2017;171(9):897-907.
- 32 4. Dorner RA, Boss RD, Burton VJ, Raja K, Lemmon ME. Parent preferences for  
33 neurodevelopmental screening in the neonatal intensive care unit. *Dev Med Child Neurol*. 2020.
- 34 5. Kwong AKL, Fitzgerald TL, Doyle LW, Cheong JLY, Spittle AJ. Predictive validity of  
35 spontaneous early infant movement for later cerebral palsy: a systematic review. *Dev Med Child*  
36 *Neurol*. 2018;60(5):480-9.
- 37 6. Bosanquet M, Copeland L, Ware R, Boyd R. A systematic review of tests to predict cerebral  
38 palsy in young children. *Developmental Medicine and Child Neurology*. 2013;55(5):418-26.
- 39 7. Darsaklis V, Snider LM, Majnemer A, Mazer B. Predictive validity of Prechtl's Method on the  
40 Qualitative Assessment of General Movements: a systematic review of the evidence. *Dev Med Child*  
41 *Neurol*. 2011;53(10):896-906.
- 42 8. Stoen R, Boswell L, de Regnier RA, Fjortoft T, Gaebler-Spira D, Ihlen E, et al. The Predictive  
43 Accuracy of the General Movement Assessment for Cerebral Palsy: A Prospective, Observational  
44 Study of High-Risk Infants in a Clinical Follow-Up Setting. *J Clin Med*. 2019;8(11).
- 45 9. Einspieler C, Prechtl HF, Bos A, Ferrari F, Cioni G. Prechtl's method on the qualitative  
46 assessment of general movements in preterm, term and young infants. London: Mac Keith Press;  
47 2004.
- 48 10. Spittle AJ, Olsen J, Kwong A, Doyle LW, Marschik PB, Einspieler C, et al. The Baby Moves  
49 prospective cohort study protocol: using a smartphone application with the General Movements  
50 Assessment to predict neurodevelopmental outcomes at age 2 years for extremely preterm or  
51 extremely low birthweight infants. *BMJ Open*. 2016;6(10):e013446.
- 52 11. Kwong AK, Eeles AL, Olsen JE, Cheong JL, Doyle LW, Spittle AJ. The Baby Moves smartphone  
53 app for General Movements Assessment: Engagement amongst extremely preterm and term-born  
54 infants in a state-wide geographical study. *J Paediatr Child Health*. 2018.
- 55 12. McCartney M. How do we know whether medical apps work? *BMJ*. 2013;346:f1811.  
56  
57  
58  
59  
60

13. Marcroft C, Khan A, Embleton ND, Trenell M, Plotz T. Movement recognition technology as a method of assessing spontaneous general movements in high risk infants. *Frontiers Neurol.* 2015;5:1-9.
14. Cabon S, Poree F, Simon A, Rosec O, Pladys P, Carrault G. Video and audio processing in paediatrics: a review. *Physiol Meas.* 2019;40(2):02TR.
15. Ihlen EAF, Stoen R, Boswell L, Regnier RA, Fjortoft T, Gaebler-Spira D, et al. Machine Learning of Infant Spontaneous Movements for the Early Prediction of Cerebral Palsy: A Multi-Site Cohort Study. *J Clin Med.* 2019;9(1).
16. Groos D, Aurlien K. Infant Body Part Tracking in Videos Using Deep Learning-Facilitating Early Detection of Cerebral Palsy: NTNU; 2018.
17. Jin M, Kim J. Development and Evaluation of an Evaluation Tool for Healthcare Smartphone Applications. *Telemed J E Health.* 2015;21(10):831-7.
18. Sciortino G, Farinella GM, Battiato S, Leo M, Distante C, editors. On the estimation of children's poses. *International Conference on Image Analysis and Processing*; 2017: Springer.
19. Hesse N, Bodensteiner C, Arens M, Hofmann UG, Weinberger R, Sebastian Schroeder A, editors. Computer vision for medical infant motion analysis: State of the art and rgb-d data set. *Proceedings of the European Conference on Computer Vision (ECCV)*; 2018.
20. J LO, McGinley JL, Fox LM, Spittle AJ. Challenges of neurodevelopmental follow-up for extremely preterm infants at two years. *Early Hum Dev.* 2015;91(12):689-94.
21. Hamilton EC, Saiyed F, Miller CC, 3rd, Eguia A, Fonseca AC, Baum GP, et al. The digital divide in adoption and use of mobile health technology among caregivers of pediatric surgery patients. *J Pediatr Surg.* 2018;53(8):1478-93.

Table 1 Summary of infant/family characteristics

|                                                              | Total N (%)<br>(n=86) | N (%) video<br>responders (n=69) | N (%) no<br>video<br>responders<br>(n=17) | p-<br>value |
|--------------------------------------------------------------|-----------------------|----------------------------------|-------------------------------------------|-------------|
| <b>Demographics</b>                                          |                       |                                  |                                           |             |
| Boys, n (%)                                                  | 51(59.3)              | 42(60.9)                         | 9(52.9)                                   | 0.32        |
| BW, mean (SD), grams                                         | 1952(1107)            | 1915(1124)                       | 2105(1055)                                | 0.67        |
| GA, mean (SD), weeks                                         | 32.4(5.3)             | 32.3(5.4)                        | 33.4(4.7)                                 | 0.43        |
| <b>Risk group</b>                                            |                       |                                  |                                           |             |
| Birth weight (BW) ≤1000 g and/or<br>gestational age (GA) <28 | 25(29.1)              | 20(29)                           | 5(29.4)                                   | 0.77        |
| Neonatal arterial ischemic stroke                            | 11(12.8)              | 4(5.8)                           | 7(41.2)                                   | 0.001       |
| Hypoxic ischemic encephalopathy                              | 20(23.3)              | 17(24.6)                         | 3(17.6)                                   | 0.06        |
| Others                                                       | 32(37.2)              | 27(39.1)                         | 5(29.4)                                   | 0.38        |
| Infant families<br>(n=63)                                    |                       |                                  |                                           |             |
| <b>Socio-demographic data*</b>                               |                       |                                  |                                           |             |
| Mother relation (survey), n (%)                              |                       | 48(76.2)                         |                                           |             |
| Married/cohabitant family, n (%)                             |                       | 59(93.7)                         |                                           |             |
| Age mother/farther, mean (SD, range)                         |                       | 31.8(5.5,21-6)                   |                                           |             |
| Age farther, mean (SD, range)                                |                       | 33.9 (6.9, 22-59)                |                                           |             |
| Single child, n (%)                                          |                       | 32 (51.6)                        |                                           |             |
| <b>iOS vs. Android</b>                                       |                       |                                  |                                           |             |
| iOS users, n (%)                                             |                       | 41(65.1)                         |                                           |             |

**Table 2** Compliance to In-Motion standards (n= 126)

|     | Active movements (not hypokinetic) | Supine position   | Correct state       | No disturbances during recording | Adequate clothing       | Adequate light | Whole body visible | Feet of parents visible |
|-----|------------------------------------|-------------------|---------------------|----------------------------------|-------------------------|----------------|--------------------|-------------------------|
| N   | 126 (100)                          | 125               | 122                 | 124                              | 125                     | 124            | 124                | 116                     |
| (%) |                                    | (99.2)            | (96.8)              | (98.4)                           | (99.2)                  | (98.4)         | (98.4)             | (92.1)*                 |
|     |                                    | Optimal stability | Abrupt displacement | Predominantly unstable           | Correct base of support |                | Image quality      |                         |
|     |                                    |                   |                     |                                  |                         | Clear          | Blurred            | Very blurred            |
| N   |                                    | 80                | 26                  | 22                               | 119                     | 114            | 11                 | 1                       |
| (%) |                                    | (63.5)            | (20.6)              | (17.5)                           | (94.4)                  | (90.5)         | (8.7)              | (0.8)                   |

\*3 missing data.



**Table 3** Parents' responses to the In-Motion-App and instructional video

|                                                                                                                | Strongly agree | Agree | Neither agree nor disagree | Disagree | Strongly disagree |
|----------------------------------------------------------------------------------------------------------------|----------------|-------|----------------------------|----------|-------------------|
| <b>In-Motion_App</b>                                                                                           |                |       |                            |          |                   |
| The In-Motion app was generally easy to use                                                                    | 58,7%          | 33,3% | 3,2%                       | 4,8%     | 0,0%              |
| It was easy to enter the information needed in the In-Motion app                                               | 46.0%          | 41.3% | 11.1%                      | 1.6%     | 0.0%              |
| The reminders about when the child should be filmed were helpful                                               | 44.4%          | 41.3% | 6.3%                       | 6.3%     | 1.6%              |
| The number of reminders about when the child should be filmed was suitable                                     | 25.4%          | 39.7% | 15.9%                      | 14.3%    | 4.8%              |
| There were no technical problems with uploading and sending the videos                                         | 55.6%          | 22.2% | 6.3%                       | 4.8%     | 11.1%             |
| <b>In-Motion standards for remote GMA</b>                                                                      |                |       |                            |          |                   |
| It was easy to understand how I should stand and hold the telephone during the filming                         | 60.0%          | 40.0% | 0.0%                       | 0.0%     | 0.0%              |
| It was easy to keep the telephone still while I was filming                                                    | 16.7%          | 46.7% | 30.0%                      | 6.7%     | 0.0%              |
| It was easy to do the filming without disturbing the child                                                     | 36.5%          | 42.9% | 9.5%                       | 11.1%    | 0.0%              |
| It was easy to understand how my child should be dressed when filmed                                           | 65.1%          | 33.3% | 0.0%                       | 1.6%     | 0.0%              |
| It was easy to understand how my child should be positioned and how the mat should be when I was going to film | 63.5%          | 28.6% | 4.8%                       | 3.2%     | 0.0%              |
| It was easy to follow the instructions about how the lighting should be during the filming                     | 36.5%          | 38.1% | 14.3%                      | 11.1%    | 0.0%              |
| Filming my child for 3 minutes went smoothly                                                                   | 39.7%          | 39.7% | 19.0%                      | 1.6%     | 0.0%              |
| <b>Parental worries</b>                                                                                        |                |       |                            |          |                   |
| I felt safe about uploading video of my child                                                                  | 63.5%          | 27.0% | 7.9%                       | 1.6%     | 0.0%              |
| I became more worried about my child's development through using the In-Motion app                             | 1.6%           | 7.9%  | 28.6%                      | 22.2%    | 39.7%             |
| Using the In-Motion app made me more attentive to my child's development                                       | 7.9%           | 36.5% | 46.0%                      | 4.8%     | 4.8%              |

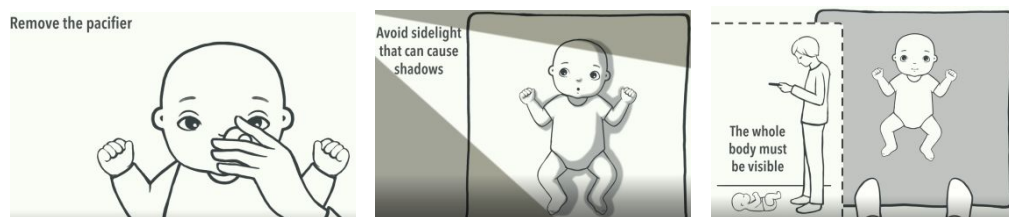

**Figure 1:** Screenshot of In-Motion instructional video showing examples of information about infant state, lighting and positioning of baby and person filming the baby.

For peer review only

1  
2  
3  
4  
5  
6  
7  
8  
9  
10  
11  
12  
13  
14  
15  
16  
17  
18  
19  
20  
21  
22  
23  
24  
25  
26  
27  
28  
29  
30  
31  
32  
33  
34  
35  
36  
37  
38  
39  
40  
41  
42  
43  
44  
45  
46  
47  
48  
49  
50  
51  
52  
53  
54  
55  
56  
57  
58  
59  
60

**Figure 2** Flow chart of infant/families with reasons for non-upload of videos.

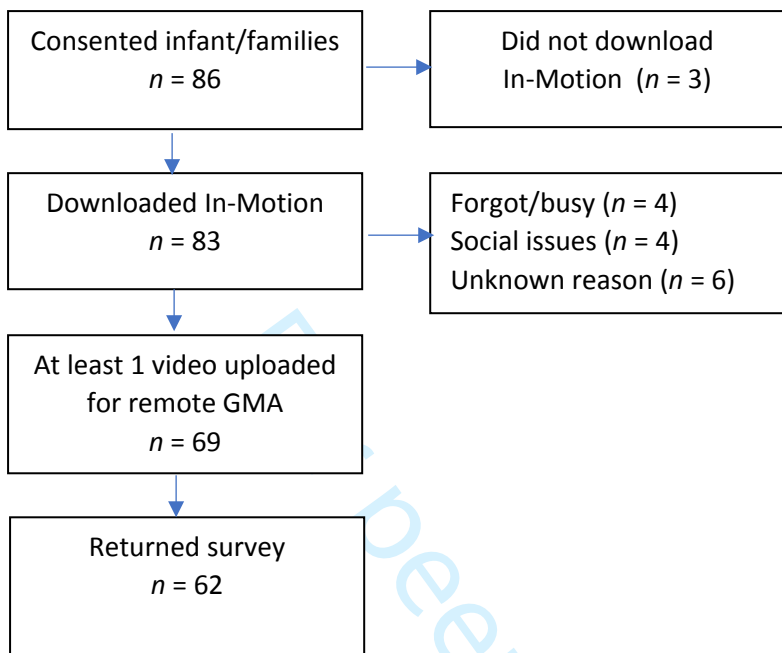

**Figure 3** Accuracy of 7 estimated body points compared with manually annotated images

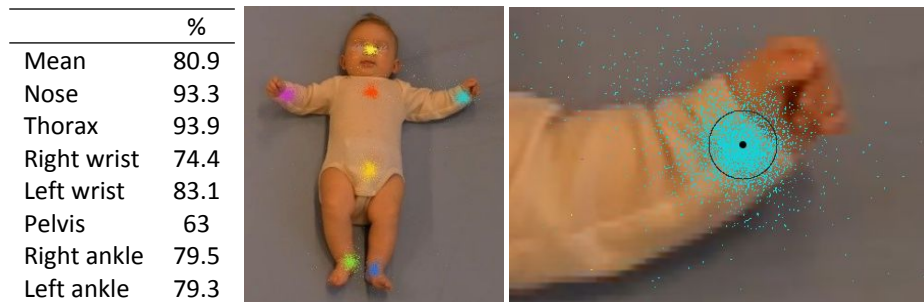

Figure 3: From left: Table with proportions of correct detected body point; illustration of the computer-based detections according to 7 body points; the distribution of the left wrist body point detections (blue dots) relative to the manually annotated landmark (black dot) where 10% of the infant head size is used as a threshold (black circle).

## Appendix S1 – Parent survey

Thank you for taking the time to answer these questions. It takes about 10-15 minutes to answer them. If you have questions, you can contact ..., email ....., or mobile telephone .....

### 1. Are you the child's mother or father?

- Mother
- Father

### 2. What is your marital status?

- Single
- Married/cohabitant
- Separated/divorced
- Widow/widower

### 3. What is your age and what is the age of your spouse/partner?

- You:
- Your spouse/partner:

### 4. How many brothers and sisters live with the child sometimes or always?

### 5. What type of mobile phone do you have?

- iPhone (iOS/Apple)
- Android

### 6. To what extent do you agree or disagree with each of these statements?

#### The In-Motion-App was generally easy to use

- Strongly disagree
- Disagree
- Neither agree nor disagree
- Agree
- Strongly agree

#### It was easy to enter the information needed in the In-Motion-App

- Strongly disagree
- Disagree
- Neither agree nor disagree
- Agree
- Strongly agree

#### The reminders about when the child should be filmed were helpful

- Strongly disagree
- Disagree
- Neither agree nor disagree
- Agree
- Strongly agree

1  
2  
3 **The number of reminders about when the child should be filmed was suitable**

- 4  Strongly disagree  
5  Disagree  
6  Neither agree nor disagree  
7  Agree  
8  Strongly agree  
9

10  
11 **There were no technical problems with uploading and sending the videos**

- 12  Strongly disagree  
13  Disagree  
14  Neither agree nor disagree  
15  Agree  
16  Strongly agree  
17

18  
19 **It was easy to understand how I should stand and hold the telephone during the filming**

- 20  Strongly disagree  
21  Disagree  
22  Neither agree nor disagree  
23  Agree  
24  Strongly agree  
25

26  
27 **It was easy to keep the telephone still while I was filming**

- 28  Strongly disagree  
29  Disagree  
30  Neither agree nor disagree  
31  Agree  
32  Strongly agree  
33

34  
35 **It was easy to do the filming without disturbing the child**

- 36  Strongly disagree  
37  Disagree  
38  Neither agree nor disagree  
39  Agree  
40  Strongly agree  
41

42  
43 **It was easy to understand how my child should be dressed when filmed**

- 44  Strongly disagree  
45  Disagree  
46  Neither agree nor disagree  
47  Agree  
48  Strongly agree  
49

50  
51 **It was easy to understand how my child should be positioned and how the mat should be  
52 when I was going to film**

- 53  Strongly disagree  
54  Disagree  
55  Neither agree nor disagree  
56  Agree  
57  Strongly agree  
58  
59  
60

1  
2  
3 **It was easy to follow the instructions about how the lighting should be during the filming**

- 4  Strongly disagree  
5  Disagree  
6  Neither agree nor disagree  
7  Agree  
8  Strongly agree  
9

10  
11 **Filming my child for 3 minutes went smoothly**

- 12  Strongly disagree  
13  Disagree  
14  Neither agree nor disagree  
15  Agree  
16  Strongly agree  
17

18  
19 **I felt safe about uploading video of my child**

- 20  Strongly disagree  
21  Disagree  
22  Neither agree nor disagree  
23  Agree  
24  Strongly agree  
25

26  
27 **I become more worried about my child's development through using the In-Motion-App**

- 28  Strongly disagree  
29  Disagree  
30  Neither agree nor disagree  
31  Agree  
32  Strongly agree  
33

34  
35 **Using the In-Motion app made me more attentive to my child's development**

- 36  Strongly disagree  
37  Disagree  
38  Neither agree nor disagree  
39  Agree  
40  Strongly agree  
41  
42  
43  
44  
45  
46  
47  
48  
49  
50  
51  
52  
53  
54  
55  
56  
57  
58  
59  
60

**STROBE 2007 (v4) Statement—Checklist of items that should be included in reports of *cohort studies***

| Section/Topic                | Item # | Recommendation                                                                                                                                                                       | Reported on page # |
|------------------------------|--------|--------------------------------------------------------------------------------------------------------------------------------------------------------------------------------------|--------------------|
| <b>Title and abstract</b>    | 1      | (a) Indicate the study's design with a commonly used term in the title or the abstract                                                                                               | 1                  |
|                              |        | (b) Provide in the abstract an informative and balanced summary of what was done and what was found                                                                                  | 2                  |
| <b>Introduction</b>          |        |                                                                                                                                                                                      |                    |
| Background/rationale         | 2      | Explain the scientific background and rationale for the investigation being reported                                                                                                 | 3                  |
| Objectives                   | 3      | State specific objectives, including any prespecified hypotheses                                                                                                                     | 3                  |
| <b>Methods</b>               |        |                                                                                                                                                                                      |                    |
| Study design                 | 4      | Present key elements of study design early in the paper                                                                                                                              | 3                  |
| Setting                      | 5      | Describe the setting, locations, and relevant dates, including periods of recruitment, exposure, follow-up, and data collection                                                      | 4                  |
| Participants                 | 6      | (a) Give the eligibility criteria, and the sources and methods of selection of participants. Describe methods of follow-up                                                           | 4                  |
|                              |        | (b) For matched studies, give matching criteria and number of exposed and unexposed                                                                                                  | na                 |
| Variables                    | 7      | Clearly define all outcomes, exposures, predictors, potential confounders, and effect modifiers. Give diagnostic criteria, if applicable                                             | 4-5                |
| Data sources/<br>measurement | 8*     | For each variable of interest, give sources of data and details of methods of assessment (measurement). Describe comparability of assessment methods if there is more than one group | 4-5                |
| Bias                         | 9      | Describe any efforts to address potential sources of bias                                                                                                                            | 5                  |
| Study size                   | 10     | Explain how the study size was arrived at                                                                                                                                            | 4                  |
| Quantitative variables       | 11     | Explain how quantitative variables were handled in the analyses. If applicable, describe which groupings were chosen and why                                                         | 6                  |
| Statistical methods          | 12     | (a) Describe all statistical methods, including those used to control for confounding                                                                                                | 6                  |
|                              |        | (b) Describe any methods used to examine subgroups and interactions                                                                                                                  | na                 |
|                              |        | (c) Explain how missing data were addressed                                                                                                                                          | na                 |
|                              |        | (d) If applicable, explain how loss to follow-up was addressed                                                                                                                       | na                 |
|                              |        | (e) Describe any sensitivity analyses                                                                                                                                                | na                 |
| <b>Results</b>               |        |                                                                                                                                                                                      |                    |



|                          |     |                                                                                                                                                                                                              |     |
|--------------------------|-----|--------------------------------------------------------------------------------------------------------------------------------------------------------------------------------------------------------------|-----|
| Participants             | 13* | (a) Report numbers of individuals at each stage of study—eg numbers potentially eligible, examined for eligibility, confirmed eligible, included in the study, completing follow-up, and analysed            | 6   |
|                          |     | (b) Give reasons for non-participation at each stage                                                                                                                                                         | 6   |
|                          |     | (c) Consider use of a flow diagram                                                                                                                                                                           | 6   |
| Descriptive data         | 14* | (a) Give characteristics of study participants (eg demographic, clinical, social) and information on exposures and potential confounders                                                                     | 7   |
|                          |     | (b) Indicate number of participants with missing data for each variable of interest                                                                                                                          | na  |
|                          |     | (c) Summarise follow-up time (eg, average and total amount)                                                                                                                                                  | na  |
| Outcome data             | 15* | Report numbers of outcome events or summary measures over time                                                                                                                                               | 6-7 |
| Main results             | 16  | (a) Give unadjusted estimates and, if applicable, confounder-adjusted estimates and their precision (eg, 95% confidence interval). Make clear which confounders were adjusted for and why they were included | na  |
|                          |     | (b) Report category boundaries when continuous variables were categorized                                                                                                                                    | na  |
|                          |     | (c) If relevant, consider translating estimates of relative risk into absolute risk for a meaningful time period                                                                                             | na  |
| Other analyses           | 17  | Report other analyses done—eg analyses of subgroups and interactions, and sensitivity analyses                                                                                                               | 6-7 |
| <b>Discussion</b>        |     |                                                                                                                                                                                                              |     |
| Key results              | 18  | Summarise key results with reference to study objectives                                                                                                                                                     | 7   |
| <b>Limitations</b>       |     |                                                                                                                                                                                                              |     |
| Interpretation           | 20  | Give a cautious overall interpretation of results considering objectives, limitations, multiplicity of analyses, results from similar studies, and other relevant evidence                                   | 7   |
| Generalisability         | 21  | Discuss the generalisability (external validity) of the study results                                                                                                                                        | 7-8 |
| <b>Other information</b> |     |                                                                                                                                                                                                              |     |
| Funding                  | 22  | Give the source of funding and the role of the funders for the present study and, if applicable, for the original study on which the present article is based                                                | 8   |

\*Give information separately for cases and controls in case-control studies and, if applicable, for exposed and unexposed groups in cohort and cross-sectional studies.

**Note:** An Explanation and Elaboration article discusses each checklist item and gives methodological background and published examples of transparent reporting. The STROBE checklist is best used in conjunction with this article (freely available on the Web sites of PLoS Medicine at <http://www.plosmedicine.org/>, Annals of Internal Medicine at <http://www.annals.org/>, and Epidemiology at <http://www.epidem.com/>). Information on the STROBE Initiative is available at [www.strobe-statement.org](http://www.strobe-statement.org).

# BMJ Open

## The In-Motion-App for remote General Movement Assessment: A multi-site observational study.

|                                 |                                                                                                                                                                                                                                                                                                                                                                                                                                                                                                                                                                                                                                                                                                                                                                                                                                                                                                                                                                                                                                                                                                                                                                                                                                                                                                                                                                                                                                                                                                                                                                                                                                                                                                                                                       |
|---------------------------------|-------------------------------------------------------------------------------------------------------------------------------------------------------------------------------------------------------------------------------------------------------------------------------------------------------------------------------------------------------------------------------------------------------------------------------------------------------------------------------------------------------------------------------------------------------------------------------------------------------------------------------------------------------------------------------------------------------------------------------------------------------------------------------------------------------------------------------------------------------------------------------------------------------------------------------------------------------------------------------------------------------------------------------------------------------------------------------------------------------------------------------------------------------------------------------------------------------------------------------------------------------------------------------------------------------------------------------------------------------------------------------------------------------------------------------------------------------------------------------------------------------------------------------------------------------------------------------------------------------------------------------------------------------------------------------------------------------------------------------------------------------|
| Journal:                        | <i>BMJ Open</i>                                                                                                                                                                                                                                                                                                                                                                                                                                                                                                                                                                                                                                                                                                                                                                                                                                                                                                                                                                                                                                                                                                                                                                                                                                                                                                                                                                                                                                                                                                                                                                                                                                                                                                                                       |
| Manuscript ID                   | bmjopen-2020-042147.R1                                                                                                                                                                                                                                                                                                                                                                                                                                                                                                                                                                                                                                                                                                                                                                                                                                                                                                                                                                                                                                                                                                                                                                                                                                                                                                                                                                                                                                                                                                                                                                                                                                                                                                                                |
| Article Type:                   | Original research                                                                                                                                                                                                                                                                                                                                                                                                                                                                                                                                                                                                                                                                                                                                                                                                                                                                                                                                                                                                                                                                                                                                                                                                                                                                                                                                                                                                                                                                                                                                                                                                                                                                                                                                     |
| Date Submitted by the Author:   | 10-Dec-2020                                                                                                                                                                                                                                                                                                                                                                                                                                                                                                                                                                                                                                                                                                                                                                                                                                                                                                                                                                                                                                                                                                                                                                                                                                                                                                                                                                                                                                                                                                                                                                                                                                                                                                                                           |
| Complete List of Authors:       | <p>Adde, Lars; Norwegian University of Science and Technology, Department of Clinical and Molecular Medicine ; St Olavs Hospital University Hospital in Trondheim, Clinic of Clinical services</p> <p>Brown, Annemette; Lund University, Department of Health Sciences; Nordsjællands Hospital, Department of Pediatric and Adolescent and Department of Neurology and Physiotherapy</p> <p>van den Broeck, Christine; Ghent University, Department of rehabilitation sciences</p> <p>DeCoen, Kris; University Hospital Ghent, Department of Neonatology</p> <p>Eriksen, Beate; Møre og Romsdal Hospital Trust, Department of Pediatrics</p> <p>Fjørtoft, Toril; St Olavs Hospital University Hospital in Trondheim, Clinic of Clinical Services; Norwegian University of Science and Technology, Department of Clinical and Molecular Medicine</p> <p>Groos, Daniel; Norwegian University of Science and Technology, Department of Neuromedicine and Movement Science</p> <p>Ihlen, Espen ; Norwegian University of Science and Technology, Department of Neuromedicine and Movement Science</p> <p>Osland, Siril; St Olavs Hospital University Hospital in Trondheim, Clinic of Clinical Services</p> <p>Pascal, Aurelie ; University of Ghent, Department of rehabilitation sciences</p> <p>Paulsen, Henriette; Vestfold Hospital Trust, Department of Physiotherapy and Rehabilitation</p> <p>Skog, Ole; Vestfold Hospital Trust, Habilitation Center</p> <p>Sivertsen, Wiebke; Møre og Romsdal Hospital Trust, Department of Pediatrics</p> <p>Støen, Ragnhild; Norwegian University of Science and Technology, Department of Clinical and Molecular Medicine; St Olavs Hospital University Hospital in Trondheim, Department of Neonatology</p> |
| <b>Primary Subject Heading</b>: | Paediatrics                                                                                                                                                                                                                                                                                                                                                                                                                                                                                                                                                                                                                                                                                                                                                                                                                                                                                                                                                                                                                                                                                                                                                                                                                                                                                                                                                                                                                                                                                                                                                                                                                                                                                                                                           |
| Secondary Subject Heading:      | Paediatrics, Neurology                                                                                                                                                                                                                                                                                                                                                                                                                                                                                                                                                                                                                                                                                                                                                                                                                                                                                                                                                                                                                                                                                                                                                                                                                                                                                                                                                                                                                                                                                                                                                                                                                                                                                                                                |
| Keywords:                       | Paediatric intensive & critical care < INTENSIVE & CRITICAL CARE, Paediatric neurology < NEUROLOGY, Developmental neurology & neurodisability < PAEDIATRICS                                                                                                                                                                                                                                                                                                                                                                                                                                                                                                                                                                                                                                                                                                                                                                                                                                                                                                                                                                                                                                                                                                                                                                                                                                                                                                                                                                                                                                                                                                                                                                                           |
|                                 |                                                                                                                                                                                                                                                                                                                                                                                                                                                                                                                                                                                                                                                                                                                                                                                                                                                                                                                                                                                                                                                                                                                                                                                                                                                                                                                                                                                                                                                                                                                                                                                                                                                                                                                                                       |

1  
2  
3  
4  
5  
6  
7  
8  
9  
10  
11  
12  
13  
14  
15  
16  
17  
18  
19  
20  
21  
22  
23  
24  
25  
26  
27  
28  
29  
30  
31  
32  
33  
34  
35  
36  
37  
38  
39  
40  
41  
42  
43  
44  
45  
46  
47  
48  
49  
50  
51  
52  
53  
54  
55  
56  
57  
58  
59  
60

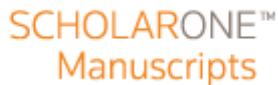



I, the Submitting Author has the right to grant and does grant on behalf of all authors of the Work (as defined in the below author licence), an exclusive licence and/or a non-exclusive licence for contributions from authors who are: i) UK Crown employees; ii) where BMJ has agreed a CC-BY licence shall apply, and/or iii) in accordance with the terms applicable for US Federal Government officers or employees acting as part of their official duties; on a worldwide, perpetual, irrevocable, royalty-free basis to BMJ Publishing Group Ltd ("BMJ") its licensees and where the relevant Journal is co-owned by BMJ to the co-owners of the Journal, to publish the Work in this journal and any other BMJ products and to exploit all rights, as set out in our [licence](#).

The Submitting Author accepts and understands that any supply made under these terms is made by BMJ to the Submitting Author unless you are acting as an employee on behalf of your employer or a postgraduate student of an affiliated institution which is paying any applicable article publishing charge ("APC") for Open Access articles. Where the Submitting Author wishes to make the Work available on an Open Access basis (and intends to pay the relevant APC), the terms of reuse of such Open Access shall be governed by a Creative Commons licence – details of these licences and which [Creative Commons](#) licence will apply to this Work are set out in our licence referred to above.

Other than as permitted in any relevant BMJ Author's Self Archiving Policies, I confirm this Work has not been accepted for publication elsewhere, is not being considered for publication elsewhere and does not duplicate material already published. I confirm all authors consent to publication of this Work and authorise the granting of this licence.

**Title:**

The In-Motion-App for remote General Movement Assessment: A multi-site observational study.

**Authors:**

Lars Adde <sup>1,2</sup>, Annemette Brown <sup>3,4</sup>, Christine van den Broeck <sup>5</sup>, Kris De Coen<sup>6</sup>, Beate Horsberg Eriksen <sup>7</sup>, Toril Fjørtoft <sup>2,1</sup>, Daniel Groos <sup>8</sup>, Espen Ihlen <sup>8</sup>, Siril Osland <sup>2</sup>, Aurelie Pascal <sup>5</sup>, Henriette Paulsen <sup>9</sup>, Ole Morten Skog <sup>10</sup>, Wiebke Sivertsen<sup>7</sup>, Ragnhild Støen <sup>1,11</sup>

<sup>1</sup> Department of Clinical and Molecular Medicine, Norwegian University of Science and Technology, Trondheim, Norway

<sup>2</sup> Clinic of Clinical Services, St. Olavs hospital, Trondheim University Hospital, Trondheim, Norway

<sup>3</sup> Department of Health sciences, Faculty of Medicine, Lund University, Lund, Sweden

<sup>4</sup> Department of Pediatric and Adolescent and Department of Neurology and Physiotherapy, Copenhagen University Hospital, Nordsjællands hospital, Denmark

<sup>5</sup> Department of rehabilitation sciences, Ghent University, Ghent, Belgium

<sup>6</sup> Department of Neonatology, University Hospital Ghent, Ghent, Belgium

<sup>7</sup> Department of Pediatrics, Møre and Romsdal Hospital trust, Ålesund Hospital, Ålesund, Norway

<sup>8</sup> Department of Neuromedicine and Movement Science, Norwegian University of Science and Technology, Trondheim, Norway

<sup>9</sup> Department of Physiotherapy and Rehabilitation, Vestfold Hospital Trust, Tønsberg, Norway

<sup>10</sup> Habilitation Center, Vestfold Hospital Trust, Tønsberg, Norway

<sup>11</sup> Department of Neonatology, St. Olavs hospital, Trondheim University Hospital, Trondheim, Norway

**Correspondence to:**

Lars Adde; [lars.adde@ntnu.no](mailto:lars.adde@ntnu.no)

**Word count:** 3784

## Abstract

**Objectives** To determine whether videos taken by parents of their infants' spontaneous movements were in accordance with required standards in the In-Motion-App, and whether the videos could be remotely scored by a trained General Movement Assessment (GMA) observer. Additionally, to assess the feasibility of using home-based video recordings for automated tracking of spontaneous movements, and to examine parents' perceptions and experiences of taking videos in their homes.

**Design** The study was a multi-center prospective observational study.

**Setting** Parents/families of high-risk infants in tertiary care follow-up programs in Norway, Denmark and Belgium.

**Methods** Parents/families were asked to video record their baby in accordance with the In-Motion standards which were based on published GMA criteria and criteria covering lighting and stability of smartphone. Videos were evaluated as GMA "scorable" or "non-scorable" based on pre-defined criteria. The accuracy of a 7-point body tracker software was compared to manually annotated body key points. Parents were surveyed about the In-Motion-App information and clarity.

**Participants** The sample comprised 86 parents/families of high-risk infants.

**Results** The 86 parent/families returned 130 videos, and 121 (96%) of them were in accordance with the requirements for GMA assessment. The 7-point body tracker software detected more than 80% of body key point positions correctly. Most families found the instructions for filming their baby easy to follow, and more than 90% reported that they did not become more worried about their child's development through using the instructions.

**Conclusions** This study reveals that a short instructional video enabled parents to video record their infant's spontaneous movements in compliance with the standards required for remote GMA. Further, an accurate automated body point software detecting infant body landmarks in smartphone videos will facilitate clinical and research use soon. Home-based video recordings could be performed without worrying parents about their child's development.

## Strengths and limitations of this study

- A cohort of families of high-risk infants frequently seen in NICU follow-up settings.
- In-Motion-App standards for remote General Movement Assessment (GMA) communicated through a simple and short animated video.
- Data from a motion tracking software on smartphone videos pioneering automatic and markerless infant motion capture.
- Study did not assess socio-demographic factors as reasons for families not to record or return videos.
- Study did not evaluate how markerless infant motion capture on smartphone videos can be used for prediction of CP outcome.

## 1. INTRODUCTION

Cerebral Palsy (CP) is the most common physical disability in childhood. Diagnosis is typically set between 12- and 24-months corrected age (1-3). Early developmental screening of high-risk infants to predict future neurological impairments is today a priority for clinicians and researchers, and most parents express interest in such neurodevelopmental screening (3, 4).

The General Movement Assessment (GMA) has been recommended in combination with magnetic resonance imaging (MRI) to achieve a CP diagnosis before 6 months corrected age in infants with newborn-detectable risk factors (3). Early detection of CP has the potential to improve the organization and resources used in follow-up screening at hospitals and reduce medical complications for children with CP. The fidgety type of general movements (GMs) observed at 9-20 weeks' corrected age has shown the highest predictive validity for later CP, compared to the writhing type of general movements observed before 9 weeks corrected age (5-8). Video recordings for GMA must follow requirements for infant state, position and clothing and are scored by certified and trained assessors (9). Such trained GMA observers also have the expertise needed to ensure that video recordings fulfill the requirements for a valid GMA (9).

Access to trained observers using the GMA in hospital-based follow-up programs is limited by geographical constraints and lack of GMA expertise (10). As health care and parents move into the digital age using smartphones to share videos via internet, opportunities to perform remote GMA have developed. Recently, the Baby Moves smartphone app was presented for remote GMA within research settings (10, 11). However, smartphone apps for health data capturing in clinical settings are rarely assessed and usability tested (12). To be feasible in a clinical follow-up setting, home-based video recordings must fulfill basic GMA requirements without the need for comprehensive parental training or guiding.

Video recordings by hand-held smartphones introduce movement artifacts in the camera. Computer-based methods for objective detection of infant GMs (13, 14) may be jeopardized by such artifacts. Our research group has recently presented a machine-learning model which predicted CP with high accuracy (sensitivity of 92%, specificity of 81%) performed by clinician using a stationary camera, comparable to observational GMA (15). Important shortcomings of the method were the need for manual and time-consuming body point annotations, as well as the need for a stationary camera. Hence, an automated 7-point body tracker has been developed by our group and needs to be validated on recordings taken with hand-held cameras.

Provided that GMs can be assessed, and computer-based infant body point tracking can be performed on videos taken with a hand-held camera, it is possible to perform remote GMA as well as automated infant body point tracking for a computer-based model for the prediction of CP. Thus, the In-Motion instructional video has been developed so that parents can perform home-based videos with quality standards feasible for remote GMA and automated infant body point tracking. Feasibility of the In-Motion instructional video was assessed in a multi-site study including families of high-risk infants from Norway, Denmark and Belgium.

The main aims of the study are as follows: 1) To determine whether videos taken by parents with a hand-held camera were in accordance with the standards set in the instructional video, and whether the videos could be scored by a trained GMA observer. 2) To assess the accuracy of a 7-point body tracker software based on the same recordings. 3) To describe parents' perceptions of the instructional video and filming their baby in a home environment.

## 2. METHODS

### Design

Multi-center prospective observational study.

### Patient and public involvement

The study protocol including the parental survey content was developed and designed collaboratively with representatives from The Norwegian Cerebral Palsy organization and The Norwegian Premature Association.

### Participants

Parents of infants admitted to one of five participating level III-IV Neonatal Infant Care Units (NICU) in Norway (three hospitals including 13, 11 and 4 families, respectively), Denmark (one hospital including 43 families) and Belgium (one hospital including 15 families) from 2018-2019 (12 months recruitment period) were consecutively recruited at referral to the hospital follow-up program before discharge from the NICU. Families were recruited based on willingness to participate and the infant being evaluated as at high-risk of CP. In Norway and Denmark inclusion criteria were (a) Birth weight (BW)  $\leq 1000$  g (extremely low birth weight (ELBW) and/or gestational age (GA)  $< 28$  (extremely low GA (ELGA)), (b) neonatal arterial ischemic stroke, (c) neonatal encephalopathy, (d) other significant risk factors. In Belgium, only infants with GA  $< 32$  weeks or with perinatal stroke were included.

### Data collection procedure

Included participants were assisted by a research physiotherapist/pediatrician at the time of inclusion to download and install the In-Motion-App by smartphone, containing the instructional video from Google Play or iTunes. They could ask any questions about the app and how to manage the software. They got information about the time window for performing two separate video recordings for their infant between  $12^{+1}$  -  $13^{+6}$  and  $14^{+1}$  -  $17^{+6}$  weeks post term age (PTA). The time points were defined to ensure GM videos from the fidgety movement's period. If no videos were returned from the families before  $17^{+6}$  weeks PTA, the local study coordinator contacted the family by phone to ask the reason why they had not uploaded any videos. The app was linked to a secure online server hosted at St. Olavs Hospital in Trondheim, Norway, and was available for i-operating system (iOS) and Android. After the end of the second time window, the families were contacted by email with a link to an online Norwegian University of Science and Technology survey to collect information about their opinions using the app and the In-Motion instructional video.

### The In-Motion-App and instructional video

The In-Motion-App and instructional video was designed by GMA trained personnel (LA, TF, RS, SO) at St. Olavs Hospital in Trondheim, Norway, for parents to give basic insight into recording standards needed for GMA and lighting and stability of camera. It was made as a short animation with simple drawn sequences containing a minimum of text. The instructional video was deployed to the parents by downloading the In-Motion-App developed for this study, and videos could be uploaded to be remotely assessed by a trained GMA observer.

After downloading the app and getting basic information from the local study coordinator, parents logged into the app with a username and a password. They typed in the first name of their child and the expected date of delivery (due date). The In-Motion-App generated two separate time windows between  $12^{+1}$  -  $13^{+6}$  and  $14^{+1}$  -  $17^{+6}$  weeks PTA and visualized them in a graphical timeline to show when videos should be taken. A red dot illustrated today's date placed on the timeline, helping parents to plan when to perform the video recordings. In addition, a pop-up message reminded parents to prepare for videos a week before the beginning of each time window. The In-Motion-App



1  
2  
3 was constructed in such a way that the video recording automatically stopped after 3 minutes and  
4 asked the parents whether to upload the video or not.

5  
6 The instructional video was 2 minutes and 47 seconds long. Before taking videos, parents were  
7 told to look through the In-Motion instructional video which was available from the app menu. They  
8 could watch the video as many times as they wanted until they felt confident performing the  
9 recording. The main themes aimed at ensuring quality standards for remote GMA included: a) clothing  
10 of infant (just a diaper or a onesie), b) surface/underlay for infant (single-color blanket or rug), c)  
11 lighting (enough light avoiding sidelight that can cause shadows), d) state of infant (awake, alert,  
12 content, not disturbing baby, no pacifier), e) positioning (baby on floor- stand next to the baby's feet,  
13 whole body must be visible) and f) length of video (3 minutes). In addition, instructions were provided  
14 about how to keep the smartphone steady and ensure that the whole infant body was observable in  
15 the video image. Examples of some of the In-Motion instructional video themes are shown in Figure  
16 1. Parents were asked to consecutively upload videos to the server at St. Olavs Hospital in Norway.  
17  
18  
19

### 20 **Assessment of video quality for remote GMA**

21 Videos were assessed by a certified GMA observer with respect to the following standards (9): 1) *GMA*  
22 *standards*: active movements (not hypokinetic), supine position, correct state, adequate clothing  
23 (diaper or a onesie), no disturbances during recording. 2) *Additional In-Motion standards*: adequate  
24 light, whole body visible, feet of parent visible in video (ensuring correct position of smartphone  
25 camera, see picture to the right in Figure 1) and camera stability. Based on these standards, a  
26 classification was made by the same certified GMA observer as either "GMA scorable" if all standard  
27 criteria were fulfilled or "GMA non-scorable" if one or more standard criteria were inadequate. In  
28 addition, all videos were observed by the same GMA expert who also categorized yes/no whether  
29 the hand-held video had optimal stability, events of abrupt displacement, was predominantly  
30 unstable, whether an adequate underlay was used (firm, comfortable, large enough) and whether  
31 overall video image quality was sufficient (blurred/very blurred).  
32  
33  
34  
35

### 36 **Assessment of General Movements**

37 All videos classified as "GMA scorable" were consecutively assessed by one certified and experienced  
38 GMA observer that had passed advanced GMs courses under the General Movement Trust (LA). The  
39 use of one observer was chosen due to the study design not focusing on GMA and prediction of  
40 outcome. The observer had no knowledge about the infant's clinical history. According to Prechtl's  
41 method of assessment of general movements (9), fidgety movements were classified as continuous  
42 (FM++), intermittent (FM+), sporadic (FM+/-), abnormal (Fa) or absent (FM-).  
43  
44  
45

### 46 **In-Motion body point tracking**

47 A subset of 66 videos from 36 infants recorded by the In-Motion-App by September 19<sup>th</sup> 2018 was  
48 used for automatic infant motion tracking to detect the displacement of 7-body points (nose, thorax  
49 (center between shoulders), wrists, pelvis, and ankles). Eighty and 20% out of 5493 frames from  
50 these videos were selected by random and chosen due to body part occlusions for motion tracking  
51 testing, respectively. The infant motion tracker algorithm consists of a convolutional neural net  
52 trained on 7-body points on 14900 video frames on high-risk infants that had participated in another  
53 study from our group (8). For further technical details of the trained convolutional neural net, the  
54 reader is referred to Groos et al (16). All 7 body points in the 5493 video test frames used in this  
55 study were manually annotated and used as ground truth, comparing them with the automatic body  
56 point positions for evaluation. The performance of the infant motion tracker is reported as  
57 percentage of points within a circular area around the manually annotated body point for the 5493  
58 test frames. In accordance with the established metric for evaluating pose-estimation (17), size of  
59  
60

1  
2  
3 the circular area was set to 10% of the infant head size and was normalized to adjust for different  
4 scaling (i.e., video zoom) (Figure 2).  
5  
6

### 7 **Survey**

8 Parents' opinions about the In-Motion-App and instructional video were collected using SelectSurvey  
9 v.4 software (ClassApps Inc., [www.classapps.com](http://www.classapps.com)) in Norway, operated by Norwegian University of  
10 Science and Technology (NTNU). In Denmark, parents' opinions were collected using Smart Trails data  
11 management software (MEDEI ApS. [www.medei.dk](http://www.medei.dk)) and in Belgium the survey was collected by post.  
12 The survey was sent to the families by a link in an email within one week after the last video was  
13 returned. The survey questions were customised for the In-Motion-App based on a tool developed by  
14 Jin and Kim in 2015 (18) and a survey used in a similar study on the Baby Moves App (11). It contained  
15 questions based on forced-choice questions covering the themes; 1) In-Motion-App, 2) In-Motion  
16 standards for remote GMA and 3) parental worries. A statement was made, and the parents indicated  
17 agreement or disagreement with the statement on a 5-point scale (Appendix S1, supplementary  
18 information).  
19  
20  
21  
22

### 23 **Data analysis**

24 Data were analyzed using SPSS statistics version 26.0 (IBM SPSS Statistics, Chicago, IL). The data are  
25 presented as numbers with proportion (%) or mean with standard deviation (SD) and range.  
26 Differences between infants with returned and no returned videos were analyzed using the Mann-  
27 Whitney U Test for continuous variables and Chi-square test and Fisher's Exact test for dichotomous  
28 variables. The accuracy of the 7-point body tracker was presented as the distribution of body point  
29 detections relative to the manually annotated body points, where 10% of the infant head size was  
30 used as a threshold.  
31  
32

## 33 **3. RESULTS**

34 In total, 86 infants/families were recruited and 17 (19.8%) out of them did not submit any video (Figure  
35 3), leaving 69 families with 130 videos for analysis.  
36  
37

38 Twenty-eight (32.6%) families were included from three different hospitals in Norway, 43 (50%) from  
39 one hospital in Copenhagen, Denmark and 15 (17.4%) from one hospital in Gent, Belgium.  
40 Infant/family characteristics are shown in table 1.  
41  
42  
43  
44  
45  
46  
47  
48  
49  
50  
51  
52  
53  
54  
55  
56  
57  
58  
59  
60

**Table 1** Summary of infant/family characteristics

|                                                              | Total N (%)<br>(n=86) | N (%) video<br>responders (n=69) | N (%) no<br>video<br>responders<br>(n=17) | p-<br>value |
|--------------------------------------------------------------|-----------------------|----------------------------------|-------------------------------------------|-------------|
| <b>Demographics</b>                                          |                       |                                  |                                           |             |
| Boys, n (%)                                                  | 51(59.3)              | 42(60.9)                         | 9(52.9)                                   | 0.32        |
| BW, mean (SD), grams                                         | 1952(1107)            | 1915(1124)                       | 2105(1055)                                | 0.67        |
| GA, mean (SD), weeks                                         | 32.4(5.3)             | 32.3(5.4)                        | 33.4(4.7)                                 | 0.43        |
| <b>Risk group</b>                                            |                       |                                  |                                           |             |
| Birth weight (BW) ≤1000 g and/or<br>gestational age (GA) <28 | 25(29.1)              | 20(29)                           | 5(29.4)                                   | 0.77        |
| Neonatal arterial ischemic stroke                            | 11(12.8)              | 4(5.8)                           | 7(41.2)                                   | 0.001       |
| Hypoxic ischemic encephalopathy                              | 20(23.3)              | 17(24.6)                         | 3(17.6)                                   | 0.06        |
| Others                                                       | 32(37.2)              | 27(39.1)                         | 5(29.4)                                   | 0.38        |
| Infant families<br>(n=63)                                    |                       |                                  |                                           |             |
| <b>Socio-demographic data*</b>                               |                       |                                  |                                           |             |
| Mother relation (survey), n (%)                              |                       | 48(76.2)                         |                                           |             |
| Married/cohabitant family, n (%)                             |                       | 59(93.7)                         |                                           |             |
| Age mother/farther, mean (SD, range)                         |                       | 31.8(5.5,21-6)                   |                                           |             |
| Age farther, mean (SD, range)                                |                       | 33.9 (6.9, 22-59)                |                                           |             |
| Single child, n (%)                                          |                       | 32 (51.6)                        |                                           |             |
| <b>iOS vs. Android</b>                                       |                       |                                  |                                           |             |
| iOS users, n (%)                                             |                       | 41(65.1)                         |                                           |             |

### 3.1 Video recordings

Two (1.5%) out of 130 videos were shorter than 3 minutes (1 minute and 12 seconds and 2 minutes and 17 seconds). The mean PTA at video recording was 14.5 weeks (SD 2.28, range 8.1-23.6 weeks).

Fifteen (11.7%) families returned one recording, 49 (71%) two recordings, 4 (5.8%) three recordings, and 1 (1.4%) six recordings. One-hundred and seventeen (90%) videos were returned within the expected time window between 12<sup>+1</sup> - 17<sup>+6</sup> weeks PTA. Two (1.5%) families returned 2 and 3 videos, respectively, which were all taken outside the time window (week 8, 10, and 21 and 23, respectively). Eleven families (8.5%) with videos from within the requested time window, had additional videos taken outside the expected time windows. Six videos from one family were taken at two different days; four videos in weeks 12 and two videos in week 14 PTA.

### 3.2 Remote General Movement Assessment

Among the six videos returned from one family, the first one from each of the two days was selected for GMA analysis. Exclusion of the remaining 4 videos and additional 4 videos excluded due to PTA

outside of the age required for assessment of FMs gave a total of 122 videos available for quality assessment.

One hundred and twenty-one (99%) out of 122 videos which were returned within the required time window were classified as GMA scorable. The video that was non-scorable had infant in side lying position. Details about compliance to the In-Motion standards are shown in Table 2.

**Table 2** Compliance to In-Motion standards (n= 126)

|     | Active movements (not hypokinetic) | Supine position   | Correct state       | No disturbances during recording | Adequate clothing       | Adequate light | Whole body visible | Feet of parents visible |
|-----|------------------------------------|-------------------|---------------------|----------------------------------|-------------------------|----------------|--------------------|-------------------------|
| N   | 126 (100)                          | 125               | 122                 | 124                              | 125                     | 124            | 124                | 116                     |
| (%) |                                    | (99.2)            | (96.8)              | (98.4)                           | (99.2)                  | (98.4)         | (98.4)             | (92.1)*                 |
|     |                                    | Optimal stability | Abrupt displacement | Predominantly unstable           | Correct base of support |                | Image quality      |                         |
|     |                                    |                   |                     |                                  |                         | Clear          | Blurred            | Very blurred            |
| N   |                                    | 80                | 26                  | 22                               | 119                     | 114            | 11                 | 1                       |
| (%) |                                    | (63.5)            | (20.6)              | (17.5)                           | (94.4)                  | (90.5)         | (8.7)              | (0.8)                   |

\*3 missing data.

### 3.3 General Movement Assessment

Of the 121 videos classified as GMA scorable, 3 (2.4%) videos were classified with exaggerated (Fa), 3 (2.4%) with absent (FM-), and 7 (5.6%) with sporadic (FM+/-) FMs. Eighty-seven (69%) and 21 (16.7%) videos were classified with intermittent (FM+) and continuous (FM++) FMs, respectively.

### 3.4 Computer-based body point tracking

The proportion of correctly predicted left wrist key point from 5493 tested video images was 83.15%. Details of accuracy of 7 predicted body points and mean value for all points are shown in Figure 2.

### 3.5 Parent responses

Survey responses were received from 64 (92.8%) families of the 69 families who returned at least one video. Fifty-four (84.3%) of them observed the instructional video one or two times before filming their baby. No families returned a video without training on filming their baby first.

The majority of the survey respondents found the In-Motion-App easy to use. All respondents agreed or strongly agreed that it was easy to understand how to stand and hold the smartphone during the filming. Details about family responses are shown in Table 3. Fifty-seven (90.5%) families strongly disagreed, disagreed or neither disagreed nor agreed that they did become more worried about their child's development through using the In-Motion instructions.

**Table 3** Parents' responses to the In-Motion-App and instructional video

|                                                                                                                | Strongly agree | Agree | Neither agree nor disagree | Disagree | Strongly disagree |
|----------------------------------------------------------------------------------------------------------------|----------------|-------|----------------------------|----------|-------------------|
| <b>In-Motion_App</b>                                                                                           |                |       |                            |          |                   |
| The In-Motion app was generally easy to use                                                                    | 58.7%          | 33.3% | 3.2%                       | 4.8%     | 0.0%              |
| It was easy to enter the information needed in the In-Motion app                                               | 46.0%          | 41.3% | 11.1%                      | 1.6%     | 0.0%              |
| The reminders about when the child should be filmed were helpful                                               | 44.4%          | 41.3% | 6.3%                       | 6.3%     | 1.6%              |
| The number of reminders about when the child should be filmed was suitable                                     | 25.4%          | 39.7% | 15.9%                      | 14.3%    | 4.8%              |
| There were no technical problems with uploading and sending the videos                                         | 55.6%          | 22.2% | 6.3%                       | 4.8%     | 11.1%             |
| <b>In-Motion standards for remote GMA</b>                                                                      |                |       |                            |          |                   |
| It was easy to understand how I should stand and hold the telephone during the filming                         | 60.0%          | 40.0% | 0.0%                       | 0.0%     | 0.0%              |
| It was easy to keep the telephone still while I was filming                                                    | 16.7%          | 46.7% | 30.0%                      | 6.7%     | 0.0%              |
| It was easy to do the filming without disturbing the child                                                     | 36.5%          | 42.9% | 9.5%                       | 11.1%    | 0.0%              |
| It was easy to understand how my child should be dressed when filmed                                           | 65.1%          | 33.3% | 0.0%                       | 1.6%     | 0.0%              |
| It was easy to understand how my child should be positioned and how the mat should be when I was going to film | 63.5%          | 28.6% | 4.8%                       | 3.2%     | 0.0%              |
| It was easy to follow the instructions about how the lighting should be during the filming                     | 36.5%          | 38.1% | 14.3%                      | 11.1%    | 0.0%              |
| Filming my child for 3 minutes went smoothly                                                                   | 39.7%          | 39.7% | 19.0%                      | 1.6%     | 0.0%              |
| <b>Parental worries</b>                                                                                        |                |       |                            |          |                   |
| I felt safe about uploading video of my child                                                                  | 63.5%          | 27.0% | 7.9%                       | 1.6%     | 0.0%              |
| I became more worried about my child's development through using the In-Motion app                             | 1.6%           | 7.9%  | 28.6%                      | 22.2%    | 39.7%             |
| Using the In-Motion app made me more attentive to my child's development                                       | 7.9%           | 36.5% | 46.0%                      | 4.8%     | 4.8%              |

## DISCUSSION

In this study, more than 95% of families with high-risk infants filming their baby at home, returned at least one video that was in accordance with the In-Motion standards for remote GMA. Most families found the In-Motion-App easy to use and the instructions for filming easy to follow, and less than 10% of respondents became worried through using the In-Motion-App. Despite the use of hand-held smartphones introducing movement artifacts in the video image, our computer-based 7-point body tracker detected positions of the body points with high accuracy. To the best of our knowledge, this is the first automatic infant body point tracker that is tested on video recordings from hand-held smartphones.

This study has several strengths. First, it included families of high-risk infants frequently seen in NICU follow-up settings. We argue that this makes our findings robust and generalizable to comparable clinical settings. Second, the communication of In-Motion standards through a simple and short animated video, makes the instructions easily applicable to a broad range of different clinical settings. Furthermore, the accuracy of the 7-point body tracker software with the use of smartphone videos makes it pioneering in the field of automatic and markerless infant motion capture compared to other studies (19, 20). This facilitates further development of methods for early automated detection of CP based on smartphone videos. Finally, the design of the study using an experienced and certified GMA observer for evaluation of video quality and a survey with very high response rate, makes the study quality high and the results trustworthy.

There are also several limitations. First, almost 20% of the included families did not return any video. This study was not designed to evaluate reasons for not recording or returning videos. We can, therefore, only conclude on the quality of returned videos. The questions in our survey may also have limitations, mainly covering topics favorable to participants returning videos, participating in follow-up and smartphone usage, giving little or reduced information about responders with low mobile health technology usage. Hence, problems encountered by families who did not record or return any video need to be further explored. Our findings are in accordance with the study by Kwong et al (11), where 24% of families did not return any video using the Baby Moves App. These findings indicate that home-based video recordings for remote GMA is not a solution for all families and that it might be difficult in a clinical setting to know beforehand which families will return a video or not. Furthermore, 13 (19%) families returned one or several videos outside the required time window needed for a valid GMA. More than 90% of respondents found the reminders in the App helpful, but one fifth disagreed that the number of reminders were appropriate. These findings indicate a limitation in the design of the app reminders and lack of programmed filming windows parameters. These app functionalities need to be improved in a process involving the users.

Second, our study comprised five different hospital sites in three different countries, and information provided to families when downloading the App may have differed. Additionally, there is a risk that the research personnel could have given more information and assistance to families than will be common in an ordinary clinical setting. Our study setting could therefore be in slight contrast to an ordinary clinical setting, where adapted and flexible family information is needed due to challenges in reduced participation in neurodevelopmental follow-up (21) and racial and socioeconomic differences in mobile health technology usage (22).

Third, even though almost 20% of the hand-held videos in our study were classified as predominantly unstable, the GMA expert considered the videos to be GMA scorable. There is a risk that more videos might have been classified as non-scorable by another GMA observer with less training and experience or if there had been several GMA experts observing the same videos. To the best of our knowledge, there is only one study protocol planning to assess the predictive validity of

1  
2  
3 GMA from videos taken with hand-held smartphones for CP outcome (10). Hence, further studies on  
4 the use of smartphones for GMA are needed.

5  
6 Finally, our computer-based 7-point body tracker showed accurate estimations compared to  
7 manual annotations on the video image. However, further studies must explore how selection of body  
8 points, tracked body point accuracy and movement artifacts in camera will influence a machine-  
9 learning model for prediction of CP from smartphone video recordings.

10  
11 This study facilitates and contributes to the use of smartphone technology for video  
12 recordings and remote GMA. Consequently, it will contribute to giving high-risk infants and their  
13 families equal access to GMA as an accurate method for early identification of CP, without  
14 geographical constraints. The use of early remote medical assessment will improve the organization  
15 and resources used in follow-up screening at hospitals and have the potential to reduce medical  
16 complications for children with CP due to early detection. A clinical feasible computer-based  
17 movement analysis with equal accuracy as GMA, will greatly reduce the need for specialized GMA  
18 observers and provide an innovative resource-effective diagnostic measure.

### 20 21 **Acknowledgements**

22 We would like to thank all the families that participated in this study. We acknowledge the support  
23 from St. Olavs Hospital, The Liaison Committee between the Central Norway Regional Health  
24 Authority and the Norwegian Open AI-Lab, Norwegian University of Science and Technology,  
25 Trondheim, Norway. Thanks also to Mia Ortvad Bjerager consultant neonatologist and the Neonatal  
26 Ward staff at Nordsjællands Hospital in Denmark for their valuable contribution to this study.

### 28 29 **Contributors**

30 Conceptualization; LA, RS, HP, OMS, TF, SO, WS, BE, CB, Data curation; LA, RS, EI, DG, Formal analysis;  
31 LA, RS, EI, DG, Funding acquisition; LA, RS, Methodology; LA, RS, EI, DG, TF, SO, Project administration;  
32 LA, BE, HP, AP, AB, CB, RS, KC, Resources; LA, TF, SO, AB, AP, HP, OMS, BE, WS, KC, Writing-original  
33 draft; LA, RS, EI, DG, Writing-review & editing; LA, RS, EI, DG, TF, SO, BE, WS, AB, AP, CB, HP, OMS, KC.

### 35 36 **Funding**

37 This work was supported by grants from St. Olavs Hospital, Trondheim, Norway and The Liaison  
38 Committee between the Central Norway Regional Health Authority and the Norwegian University of  
39 Science and Technology, Trondheim, Norway (SO: 90056100). In Denmark the study was supported  
40 by grants from Nordsjællands Hospital, University Hospital of Copenhagen, Hillerød (PSP E-20231-18-  
41 01).

### 43 44 **Competing interests**

45 None declared.

### 46 47 **Patient consent**

48 Obtained in all participants.

### 49 50 **Ethics approval**

51 All infant/families provided written informed consent and ethics was approved by the regional  
52 committee for medical and health research ethics (REC Central-Committee 2017/913) in Norway. The  
53 study sites in Denmark and Belgium also had approvals from their local Institutional Review boards.  
54 Study registration in ClinicalTrials.gov Protocol Record 2017/913.

### 56 57 **Provenance and peer review**

58 Not commissioned; external peer reviewed.

### 59 60 **Data availability statement**

No data are available. Data from this study are not available for sharing due to ethical approval requirements. Researchers interested in collaboration should contact the corresponding author with their expression of interest.

### Open Access

This is an Open Access article distributed in accordance with the Creative Common Attribution Non-Commercial (CC BY-NC 4.0) license, which permits others to distribute, remix, adapt, build upon this work non-commercially, and license their derivative works on different terms, provided the original work is properly cited and the use is non-commercial. See: <http://creativecommons.org/licenses/by-nc/4.0/>

### REFERENCES

1. Granild-Jensen JB, Rackauskaite G, Flachs EM, Uldall P. Predictors for early diagnosis of cerebral palsy from national registry data. *Dev Med Child Neurol*. 2015.
2. Hubermann L, Boychuck Z, Shevell M, Majnemer A. Age at Referral of Children for Initial Diagnosis of Cerebral Palsy and Rehabilitation: Current Practices. *J Child Neurol*. 2016;31(3):364-9.
3. Novak I, Morgan C, Adde L, Blackman J, Boyd RN, Brunstrom-Hernandez J, et al. Early, Accurate Diagnosis and Early Intervention in Cerebral Palsy: Advances in Diagnosis and Treatment. *JAMA Pediatr*. 2017;171(9):897-907.
4. Dorner RA, Boss RD, Burton VJ, Raja K, Lemmon ME. Parent preferences for neurodevelopmental screening in the neonatal intensive care unit. *Dev Med Child Neurol*. 2020.
5. Kwong AKL, Fitzgerald TL, Doyle LW, Cheong JLY, Spittle AJ. Predictive validity of spontaneous early infant movement for later cerebral palsy: a systematic review. *Dev Med Child Neurol*. 2018;60(5):480-9.
6. Bosanquet M, Copeland L, Ware R, Boyd R. A systematic review of tests to predict cerebral palsy in young children. *Developmental Medicine and Child Neurology*. 2013;55(5):418-26.
7. Darsaklis V, Snider LM, Majnemer A, Mazer B. Predictive validity of Prechtl's Method on the Qualitative Assessment of General Movements: a systematic review of the evidence. *Dev Med Child Neurol*. 2011;53(10):896-906.
8. Stoen R, Boswell L, de Regnier RA, Fjortoft T, Gaebler-Spira D, Ihlen E, et al. The Predictive Accuracy of the General Movement Assessment for Cerebral Palsy: A Prospective, Observational Study of High-Risk Infants in a Clinical Follow-Up Setting. *J Clin Med*. 2019;8(11).
9. Einspieler C, Prechtl HF, Bos A, Ferrari F, Cioni G. Prechtl's method on the qualitative assessment of general movements in preterm, term and young infants. London: Mac Keith Press; 2004.
10. Spittle AJ, Olsen J, Kwong A, Doyle LW, Marschik PB, Einspieler C, et al. The Baby Moves prospective cohort study protocol: using a smartphone application with the General Movements Assessment to predict neurodevelopmental outcomes at age 2 years for extremely preterm or extremely low birthweight infants. *BMJ Open*. 2016;6(10):e013446.
11. Kwong AK, Eeles AL, Olsen JE, Cheong JL, Doyle LW, Spittle AJ. The Baby Moves smartphone app for General Movements Assessment: Engagement amongst extremely preterm and term-born infants in a state-wide geographical study. *J Paediatr Child Health*. 2018.
12. McCartney M. How do we know whether medical apps work? *BMJ*. 2013;346:f1811.
13. Marcroft C, Khan A, Embleton ND, Trenell M, Plotz T. Movement recognition technology as a method of assessing spontaneous general movements in high risk infants. *Frontiers Neurol*. 2015;5:1-9.
14. Cabon S, Poree F, Simon A, Rosec O, Pladys P, Carrault G. Video and audio processing in paediatrics: a review. *Physiol Meas*. 2019;40(2):02TR.
15. Ihlen EAF, Stoen R, Boswell L, Regnier RA, Fjortoft T, Gaebler-Spira D, et al. Machine Learning of Infant Spontaneous Movements for the Early Prediction of Cerebral Palsy: A Multi-Site Cohort Study. *J Clin Med*. 2019;9(1).



- 1  
2  
3 16. Groos D, Aurlien K. Infant Body Part Tracking in Videos Using Deep Learning-Facilitating Early  
4 Detection of Cerebral Palsy: NTNU; 2018.  
5 17. Groos D, Ramampiaro H, Ihlen E. EfficientPose: Scalable single-person pose estimation. arXiv  
6 preprint arXiv:200412186. 2020.  
7 18. Jin M, Kim J. Development and Evaluation of an Evaluation Tool for Healthcare Smartphone  
8 Applications. *Telemed J E Health*. 2015;21(10):831-7.  
9 19. Sciortino G, Farinella GM, Battiato S, Leo M, Distante C, editors. On the estimation of  
10 children's poses. *International Conference on Image Analysis and Processing*; 2017: Springer.  
11 20. Hesse N, Bodensteiner C, Arens M, Hofmann UG, Weinberger R, Sebastian Schroeder A,  
12 editors. Computer vision for medical infant motion analysis: State of the art and rgb-d data set.  
13 *Proceedings of the European Conference on Computer Vision (ECCV)*; 2018.  
14 21. J LO, McGinley JL, Fox LM, Spittle AJ. Challenges of neurodevelopmental follow-up for  
15 extremely preterm infants at two years. *Early Hum Dev*. 2015;91(12):689-94.  
16 22. Hamilton EC, Saiyed F, Miller CC, 3rd, Eguia A, Fonseca AC, Baum GP, et al. The digital divide  
17 in adoption and use of mobile health technology among caregivers of pediatric surgery patients. *J*  
18 *Pediatr Surg*. 2018;53(8):1478-93.  
19  
20  
21  
22  
23  
24  
25

26 Figure title – Figure 1

27 **Figure 1:** Screenshot of In-Motion instructional video showing examples of information about infant  
28 state, lighting and positioning of baby and person filming the baby.  
29

30  
31  
32 Figure title and legend – Figure 2

33 **Figure 2** Accuracy of 7 estimated body points compared with manually annotated images  
34  
35  
36  
37  
38  
39

40 Figure 2: From left: Table with proportions of correct detected body point; illustration of the  
41 computer-based detections according to 7 body points; the distribution of the left wrist body point  
42 detections (blue dots) relative to the manually annotated landmark (black dot) where 10% of the  
43 infant head size is used as a threshold (black circle).  
44  
45  
46  
47  
48  
49  
50

51 Figure title – Figure 3

52 **Figure 3** Flow chart of infant/families with reasons for non-upload of videos.  
53  
54  
55  
56  
57  
58  
59  
60

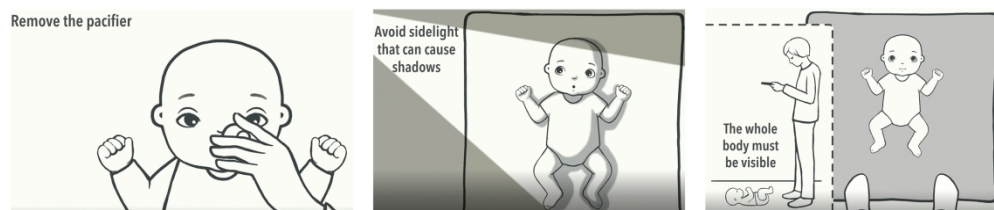

Figure 1: Screenshot of In-Motion instructional video showing examples of information about infant state, lighting and positioning of baby and person filming the baby.

209x44mm (300 x 300 DPI)

1  
2  
3  
4  
5  
6  
7  
8  
9  
10  
11  
12  
13  
14  
15  
16  
17  
18  
19  
20  
21  
22  
23  
24  
25  
26  
27  
28  
29  
30  
31  
32  
33  
34  
35  
36  
37  
38  
39  
40  
41  
42  
43  
44  
45  
46  
47  
48  
49  
50  
51  
52  
53  
54  
55  
56  
57  
58  
59  
60

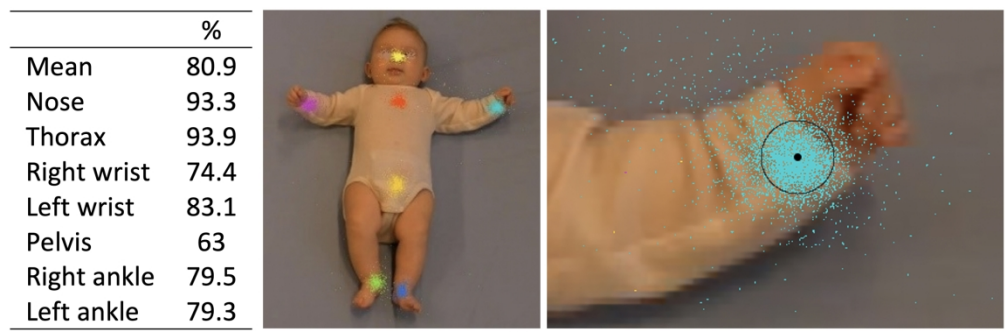

Figure 2 Accuracy of 7 estimated body points compared with manually annotated images  
 Figure 2: From left: Table with proportions of correct detected body point; illustration of the computer-based detections according to 7 body points; the distribution of the left wrist body point detections (blue dots) relative to the manually annotated landmark (black dot) where 10% of the infant head size is used as a threshold (black circle).

209x68mm (300 x 300 DPI)

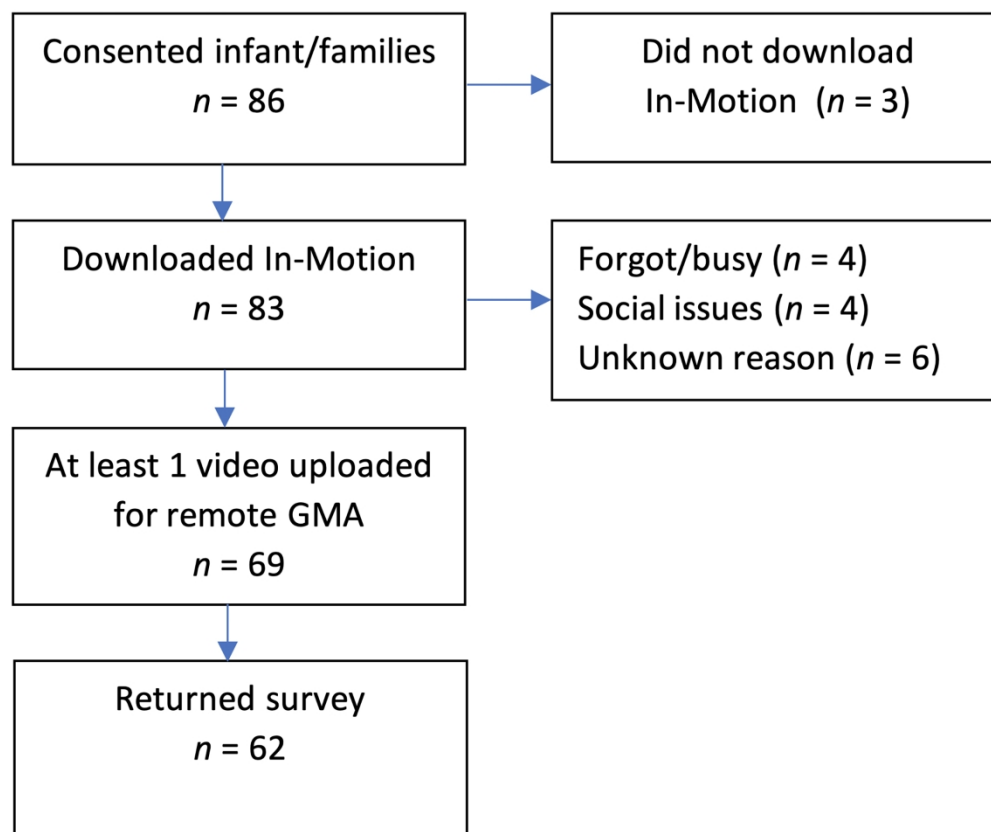

Figure 3 Flow chart of infant/families with reasons for non-upload of videos.

209x174mm (300 x 300 DPI)

## Appendix S1 – Parent survey

Thank you for taking the time to answer these questions. It takes about 10-15 minutes to answer them. If you have questions, you can contact ..., email ....., or mobile telephone .....

### 1. Are you the child's mother or father?

- Mother
- Father

### 2. What is your marital status?

- Single
- Married/cohabitant
- Separated/divorced
- Widow/widower

### 3. What is your age and is the age of your spouse/partner?

- You:
- Your spouse/partner:

### 4. How many brothers and sisters live with the child sometimes or always?

### 5. What type of mobile phone do you have?

- iPhone (iOS/Apple)
- Android

### 6. To what extent do you agree or disagree with each of these statements?

#### The In-Motion-App was generally easy to use

- Strongly disagree
- Disagree
- Neither agree nor disagree
- Agree
- Strongly agree

#### It was easy to enter the information needed in the In-Motion-App

- Strongly disagree
- Disagree
- Neither agree nor disagree
- Agree
- Strongly agree

#### The reminders about when the child should be filmed were helpful

- Strongly disagree
- Disagree
- Neither agree nor disagree
- Agree
- Strongly agree

1  
2  
3 **The number of reminders about when the child should be filmed was suitable**

- 4  Strongly disagree  
5  Disagree  
6  Neither agree nor disagree  
7  Agree  
8  Strongly agree  
9

10  
11 **There were no technical problems with uploading and sending the videos**

- 12  Strongly disagree  
13  Disagree  
14  Neither agree nor disagree  
15  Agree  
16  Strongly agree  
17

18  
19 **It was easy to understand how I should stand and hold the telephone during the filming**

- 20  Strongly disagree  
21  Disagree  
22  Neither agree nor disagree  
23  Agree  
24  Strongly agree  
25

26  
27 **It was easy to keep the telephone still while I was filming**

- 28  Strongly disagree  
29  Disagree  
30  Neither agree nor disagree  
31  Agree  
32  Strongly agree  
33

34  
35 **It was easy to do the filming without disturbing the child**

- 36  Strongly disagree  
37  Disagree  
38  Neither agree nor disagree  
39  Agree  
40  Strongly agree  
41

42  
43 **It was easy to understand how my child should be dressed when filmed**

- 44  Strongly disagree  
45  Disagree  
46  Neither agree nor disagree  
47  Agree  
48  Strongly agree  
49

50  
51 **It was easy to understand how my child should be positioned and how the mat should be  
when I was going to film**

- 52  Strongly disagree  
53  Disagree  
54  Neither agree nor disagree  
55  Agree  
56  Strongly agree  
57  
58  
59  
60

1  
2  
3 **It was easy to follow the instructions about how the lighting should be during the filming**

- 4  Strongly disagree  
5  Disagree  
6  Neither agree nor disagree  
7  Agree  
8  Strongly agree  
9

10  
11 **Filming my child for 3 minutes went smoothly**

- 12  Strongly disagree  
13  Disagree  
14  Neither agree nor disagree  
15  Agree  
16  Strongly agree  
17

18  
19 **I felt safe about uploading video of my child**

- 20  Strongly disagree  
21  Disagree  
22  Neither agree nor disagree  
23  Agree  
24  Strongly agree  
25

26  
27 **I become more worried about my child's development through using the In-Motion-App**

- 28  Strongly disagree  
29  Disagree  
30  Neither agree nor disagree  
31  Agree  
32  Strongly agree  
33

34  
35 **Using the In-Motion app made me more attentive to my child's development**

- 36  Strongly disagree  
37  Disagree  
38  Neither agree nor disagree  
39  Agree  
40  Strongly agree  
41  
42  
43  
44  
45  
46  
47  
48  
49  
50  
51  
52  
53  
54  
55  
56  
57  
58  
59  
60

**STROBE 2007 (v4) Statement—Checklist of items that should be included in reports of *cohort studies***

| Section/Topic                | Item # | Recommendation                                                                                                                                                                       | Reported on page # |
|------------------------------|--------|--------------------------------------------------------------------------------------------------------------------------------------------------------------------------------------|--------------------|
| <b>Title and abstract</b>    | 1      | (a) Indicate the study's design with a commonly used term in the title or the abstract                                                                                               | 1                  |
|                              |        | (b) Provide in the abstract an informative and balanced summary of what was done and what was found                                                                                  | 2                  |
| <b>Introduction</b>          |        |                                                                                                                                                                                      |                    |
| Background/rationale         | 2      | Explain the scientific background and rationale for the investigation being reported                                                                                                 | 3                  |
| Objectives                   | 3      | State specific objectives, including any prespecified hypotheses                                                                                                                     | 3                  |
| <b>Methods</b>               |        |                                                                                                                                                                                      |                    |
| Study design                 | 4      | Present key elements of study design early in the paper                                                                                                                              | 3                  |
| Setting                      | 5      | Describe the setting, locations, and relevant dates, including periods of recruitment, exposure, follow-up, and data collection                                                      | 4                  |
| Participants                 | 6      | (a) Give the eligibility criteria, and the sources and methods of selection of participants. Describe methods of follow-up                                                           | 4                  |
|                              |        | (b) For matched studies, give matching criteria and number of exposed and unexposed                                                                                                  | na                 |
| Variables                    | 7      | Clearly define all outcomes, exposures, predictors, potential confounders, and effect modifiers. Give diagnostic criteria, if applicable                                             | 4-5                |
| Data sources/<br>measurement | 8*     | For each variable of interest, give sources of data and details of methods of assessment (measurement). Describe comparability of assessment methods if there is more than one group | 4-5                |
| Bias                         | 9      | Describe any efforts to address potential sources of bias                                                                                                                            | 5                  |
| Study size                   | 10     | Explain how the study size was arrived at                                                                                                                                            | 4                  |
| Quantitative variables       | 11     | Explain how quantitative variables were handled in the analyses. If applicable, describe which groupings were chosen and why                                                         | 6                  |
| Statistical methods          | 12     | (a) Describe all statistical methods, including those used to control for confounding                                                                                                | 6                  |
|                              |        | (b) Describe any methods used to examine subgroups and interactions                                                                                                                  | na                 |
|                              |        | (c) Explain how missing data were addressed                                                                                                                                          | na                 |
|                              |        | (d) If applicable, explain how loss to follow-up was addressed                                                                                                                       | na                 |
|                              |        | (e) Describe any sensitivity analyses                                                                                                                                                | na                 |
| <b>Results</b>               |        |                                                                                                                                                                                      |                    |



|                          |     |                                                                                                                                                                                                              |     |
|--------------------------|-----|--------------------------------------------------------------------------------------------------------------------------------------------------------------------------------------------------------------|-----|
| Participants             | 13* | (a) Report numbers of individuals at each stage of study—eg numbers potentially eligible, examined for eligibility, confirmed eligible, included in the study, completing follow-up, and analysed            | 6   |
|                          |     | (b) Give reasons for non-participation at each stage                                                                                                                                                         | 6   |
|                          |     | (c) Consider use of a flow diagram                                                                                                                                                                           | 6   |
| Descriptive data         | 14* | (a) Give characteristics of study participants (eg demographic, clinical, social) and information on exposures and potential confounders                                                                     | 7   |
|                          |     | (b) Indicate number of participants with missing data for each variable of interest                                                                                                                          | na  |
|                          |     | (c) Summarise follow-up time (eg, average and total amount)                                                                                                                                                  | na  |
| Outcome data             | 15* | Report numbers of outcome events or summary measures over time                                                                                                                                               | 6-7 |
| Main results             | 16  | (a) Give unadjusted estimates and, if applicable, confounder-adjusted estimates and their precision (eg, 95% confidence interval). Make clear which confounders were adjusted for and why they were included | na  |
|                          |     | (b) Report category boundaries when continuous variables were categorized                                                                                                                                    | na  |
|                          |     | (c) If relevant, consider translating estimates of relative risk into absolute risk for a meaningful time period                                                                                             | na  |
| Other analyses           | 17  | Report other analyses done—eg analyses of subgroups and interactions, and sensitivity analyses                                                                                                               | 6-7 |
| <b>Discussion</b>        |     |                                                                                                                                                                                                              |     |
| Key results              | 18  | Summarise key results with reference to study objectives                                                                                                                                                     | 7   |
| <b>Limitations</b>       |     |                                                                                                                                                                                                              |     |
| Interpretation           | 20  | Give a cautious overall interpretation of results considering objectives, limitations, multiplicity of analyses, results from similar studies, and other relevant evidence                                   | 7   |
| Generalisability         | 21  | Discuss the generalisability (external validity) of the study results                                                                                                                                        | 7-8 |
| <b>Other information</b> |     |                                                                                                                                                                                                              |     |
| Funding                  | 22  | Give the source of funding and the role of the funders for the present study and, if applicable, for the original study on which the present article is based                                                | 8   |

\*Give information separately for cases and controls in case-control studies and, if applicable, for exposed and unexposed groups in cohort and cross-sectional studies.

**Note:** An Explanation and Elaboration article discusses each checklist item and gives methodological background and published examples of transparent reporting. The STROBE checklist is best used in conjunction with this article (freely available on the Web sites of PLoS Medicine at <http://www.plosmedicine.org/>, Annals of Internal Medicine at <http://www.annals.org/>, and Epidemiology at <http://www.epidem.com/>). Information on the STROBE Initiative is available at [www.strobe-statement.org](http://www.strobe-statement.org).

# BMJ Open

## The In-Motion-App for remote General Movement Assessment: A multi-site observational study.

|                                 |                                                                                                                                                                                                                                                                                                                                                                                                                                                                                                                                                                                                                                                                                                                                                                                                                                                                                                                                                                                                                                                                                                                                                                                                                                                                                                                                                                                                                                                                                                                                                                                                                                                                                                                                                       |
|---------------------------------|-------------------------------------------------------------------------------------------------------------------------------------------------------------------------------------------------------------------------------------------------------------------------------------------------------------------------------------------------------------------------------------------------------------------------------------------------------------------------------------------------------------------------------------------------------------------------------------------------------------------------------------------------------------------------------------------------------------------------------------------------------------------------------------------------------------------------------------------------------------------------------------------------------------------------------------------------------------------------------------------------------------------------------------------------------------------------------------------------------------------------------------------------------------------------------------------------------------------------------------------------------------------------------------------------------------------------------------------------------------------------------------------------------------------------------------------------------------------------------------------------------------------------------------------------------------------------------------------------------------------------------------------------------------------------------------------------------------------------------------------------------|
| Journal:                        | <i>BMJ Open</i>                                                                                                                                                                                                                                                                                                                                                                                                                                                                                                                                                                                                                                                                                                                                                                                                                                                                                                                                                                                                                                                                                                                                                                                                                                                                                                                                                                                                                                                                                                                                                                                                                                                                                                                                       |
| Manuscript ID                   | bmjopen-2020-042147.R2                                                                                                                                                                                                                                                                                                                                                                                                                                                                                                                                                                                                                                                                                                                                                                                                                                                                                                                                                                                                                                                                                                                                                                                                                                                                                                                                                                                                                                                                                                                                                                                                                                                                                                                                |
| Article Type:                   | Original research                                                                                                                                                                                                                                                                                                                                                                                                                                                                                                                                                                                                                                                                                                                                                                                                                                                                                                                                                                                                                                                                                                                                                                                                                                                                                                                                                                                                                                                                                                                                                                                                                                                                                                                                     |
| Date Submitted by the Author:   | 21-Jan-2021                                                                                                                                                                                                                                                                                                                                                                                                                                                                                                                                                                                                                                                                                                                                                                                                                                                                                                                                                                                                                                                                                                                                                                                                                                                                                                                                                                                                                                                                                                                                                                                                                                                                                                                                           |
| Complete List of Authors:       | <p>Adde, Lars; Norwegian University of Science and Technology, Department of Clinical and Molecular Medicine ; St Olavs Hospital University Hospital in Trondheim, Clinic of Clinical services</p> <p>Brown, Annemette; Lund University, Department of Health Sciences; Nordsjællands Hospital, Department of Pediatric and Adolescent and Department of Neurology and Physiotherapy</p> <p>van den Broeck, Christine; Ghent University, Department of rehabilitation sciences</p> <p>DeCoen, Kris; University Hospital Ghent, Department of Neonatology</p> <p>Eriksen, Beate; Møre og Romsdal Hospital Trust, Department of Pediatrics</p> <p>Fjørtoft, Toril; St Olavs Hospital University Hospital in Trondheim, Clinic of Clinical Services; Norwegian University of Science and Technology, Department of Clinical and Molecular Medicine</p> <p>Groos, Daniel; Norwegian University of Science and Technology, Department of Neuromedicine and Movement Science</p> <p>Ihlen, Espen ; Norwegian University of Science and Technology, Department of Neuromedicine and Movement Science</p> <p>Osland, Siril; St Olavs Hospital University Hospital in Trondheim, Clinic of Clinical Services</p> <p>Pascal, Aurelie ; University of Ghent, Department of rehabilitation sciences</p> <p>Paulsen, Henriette; Vestfold Hospital Trust, Department of Physiotherapy and Rehabilitation</p> <p>Skog, Ole; Vestfold Hospital Trust, Habilitation Center</p> <p>Sivertsen, Wiebke; Møre og Romsdal Hospital Trust, Department of Pediatrics</p> <p>Støen, Ragnhild; Norwegian University of Science and Technology, Department of Clinical and Molecular Medicine; St Olavs Hospital University Hospital in Trondheim, Department of Neonatology</p> |
| <b>Primary Subject Heading</b>: | Paediatrics                                                                                                                                                                                                                                                                                                                                                                                                                                                                                                                                                                                                                                                                                                                                                                                                                                                                                                                                                                                                                                                                                                                                                                                                                                                                                                                                                                                                                                                                                                                                                                                                                                                                                                                                           |
| Secondary Subject Heading:      | Paediatrics, Neurology                                                                                                                                                                                                                                                                                                                                                                                                                                                                                                                                                                                                                                                                                                                                                                                                                                                                                                                                                                                                                                                                                                                                                                                                                                                                                                                                                                                                                                                                                                                                                                                                                                                                                                                                |
| Keywords:                       | Paediatric intensive & critical care < INTENSIVE & CRITICAL CARE, Paediatric neurology < NEUROLOGY, Developmental neurology & neurodisability < PAEDIATRICS                                                                                                                                                                                                                                                                                                                                                                                                                                                                                                                                                                                                                                                                                                                                                                                                                                                                                                                                                                                                                                                                                                                                                                                                                                                                                                                                                                                                                                                                                                                                                                                           |
|                                 |                                                                                                                                                                                                                                                                                                                                                                                                                                                                                                                                                                                                                                                                                                                                                                                                                                                                                                                                                                                                                                                                                                                                                                                                                                                                                                                                                                                                                                                                                                                                                                                                                                                                                                                                                       |

1  
2  
3  
4  
5  
6  
7  
8  
9  
10  
11  
12  
13  
14  
15  
16  
17  
18  
19  
20  
21  
22  
23  
24  
25  
26  
27  
28  
29  
30  
31  
32  
33  
34  
35  
36  
37  
38  
39  
40  
41  
42  
43  
44  
45  
46  
47  
48  
49  
50  
51  
52  
53  
54  
55  
56  
57  
58  
59  
60



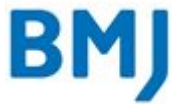

I, the Submitting Author has the right to grant and does grant on behalf of all authors of the Work (as defined in the below author licence), an exclusive licence and/or a non-exclusive licence for contributions from authors who are: i) UK Crown employees; ii) where BMJ has agreed a CC-BY licence shall apply, and/or iii) in accordance with the terms applicable for US Federal Government officers or employees acting as part of their official duties; on a worldwide, perpetual, irrevocable, royalty-free basis to BMJ Publishing Group Ltd ("BMJ") its licensees and where the relevant Journal is co-owned by BMJ to the co-owners of the Journal, to publish the Work in this journal and any other BMJ products and to exploit all rights, as set out in our [licence](#).

The Submitting Author accepts and understands that any supply made under these terms is made by BMJ to the Submitting Author unless you are acting as an employee on behalf of your employer or a postgraduate student of an affiliated institution which is paying any applicable article publishing charge ("APC") for Open Access articles. Where the Submitting Author wishes to make the Work available on an Open Access basis (and intends to pay the relevant APC), the terms of reuse of such Open Access shall be governed by a Creative Commons licence – details of these licences and which [Creative Commons](#) licence will apply to this Work are set out in our licence referred to above.

Other than as permitted in any relevant BMJ Author's Self Archiving Policies, I confirm this Work has not been accepted for publication elsewhere, is not being considered for publication elsewhere and does not duplicate material already published. I confirm all authors consent to publication of this Work and authorise the granting of this licence.

**Title:**

The In-Motion-App for remote General Movement Assessment: A multi-site observational study.

**Authors:**

Lars Adde <sup>1,2</sup>, Annemette Brown <sup>3,4</sup>, Christine van den Broeck <sup>5</sup>, Kris De Coen<sup>6</sup>, Beate Horsberg Eriksen <sup>7</sup>, Toril Fjørtoft <sup>2,1</sup>, Daniel Groos <sup>8</sup>, Espen Ihlen <sup>8</sup>, Siril Osland <sup>2</sup>, Aurelie Pascal <sup>5</sup>, Henriette Paulsen <sup>9</sup>, Ole Morten Skog <sup>10</sup>, Wiebke Sivertsen<sup>7</sup>, Ragnhild Støen <sup>1,11</sup>

<sup>1</sup> Department of Clinical and Molecular Medicine, Norwegian University of Science and Technology, Trondheim, Norway

<sup>2</sup> Clinic of Clinical Services, St. Olavs hospital, Trondheim University Hospital, Trondheim, Norway

<sup>3</sup> Department of Health sciences, Faculty of Medicine, Lund University, Lund, Sweden

<sup>4</sup> Department of Pediatric and Adolescent and Department of Neurology and Physiotherapy, Copenhagen University Hospital, Nordsjællands hospital, Denmark

<sup>5</sup> Department of rehabilitation sciences, Ghent University, Ghent, Belgium

<sup>6</sup> Department of Neonatology, University Hospital Ghent, Ghent, Belgium

<sup>7</sup> Department of Pediatrics, Møre and Romsdal Hospital trust, Ålesund Hospital, Ålesund, Norway

<sup>8</sup> Department of Neuromedicine and Movement Science, Norwegian University of Science and Technology, Trondheim, Norway

<sup>9</sup> Department of Physiotherapy and Rehabilitation, Vestfold Hospital Trust, Tønsberg, Norway

<sup>10</sup> Habilitation Center, Vestfold Hospital Trust, Tønsberg, Norway

<sup>11</sup> Department of Neonatology, St. Olavs hospital, Trondheim University Hospital, Trondheim, Norway

**Correspondence to:**

Lars Adde; [lars.adde@ntnu.no](mailto:lars.adde@ntnu.no)

**Word count:** 3833

## Abstract

**Objectives** To determine whether videos taken by parents of their infants' spontaneous movements were in accordance with required standards in the In-Motion-App, and whether the videos could be remotely scored by a trained General Movement Assessment (GMA) observer. Additionally, to assess the feasibility of using home-based video recordings for automated tracking of spontaneous movements, and to examine parents' perceptions and experiences of taking videos in their homes.

**Design** The study was a multi-center prospective observational study.

**Setting** Parents/families of high-risk infants in tertiary care follow-up programs in Norway, Denmark and Belgium.

**Methods** Parents/families were asked to video record their baby in accordance with the In-Motion standards which were based on published GMA criteria and criteria covering lighting and stability of smartphone. Videos were evaluated as GMA "scorable" or "non-scorable" based on pre-defined criteria. The accuracy of a 7-point body tracker software was compared to manually annotated body key points. Parents were surveyed about the In-Motion-App information and clarity.

**Participants** The sample comprised 86 parents/families of high-risk infants.

**Results** The 86 parent/families returned 130 videos, and 121 (96%) of them were in accordance with the requirements for GMA assessment. The 7-point body tracker software detected more than 80% of body key point positions correctly. Most families found the instructions for filming their baby easy to follow, and more than 90% reported that they did not become more worried about their child's development through using the instructions.

**Conclusions** This study reveals that a short instructional video enabled parents to video record their infant's spontaneous movements in compliance with the standards required for remote GMA. Further, an accurate automated body point software detecting infant body landmarks in smartphone videos will facilitate clinical and research use soon. Home-based video recordings could be performed without worrying parents about their child's development.

## Strengths and limitations of this study

- A cohort of families of high-risk infants frequently seen in NICU follow-up settings.
- In-Motion-App standards for remote General Movement Assessment (GMA) communicated through a simple and short animated video.
- Data from a motion tracking software on smartphone videos pioneering automatic and markerless infant motion capture.
- Study did not assess socio-demographic factors as reasons for families not to record or return videos.
- Study did not evaluate how markerless infant motion capture on smartphone videos can be used for prediction of CP outcome.

## 1. INTRODUCTION

Cerebral Palsy (CP) is the most common physical disability in childhood. Diagnosis is typically set between 12- and 24-months corrected age (1-3). Early developmental screening of high-risk infants to predict future neurological impairments is today a priority for clinicians and researchers, and most parents express interest in such neurodevelopmental screening (3, 4).

The General Movement Assessment (GMA) has been recommended in combination with magnetic resonance imaging (MRI) to achieve a CP diagnosis before 6 months corrected age in infants with newborn-detectable risk factors (3). Early detection of CP has the potential to improve the organization and resources used in follow-up screening at hospitals and reduce medical complications for children with CP. The fidgety type of general movements (GMs) observed at 9-20 weeks' corrected age has shown the highest predictive validity for later CP, compared to the writhing type of general movements observed before 9 weeks corrected age (5-8). Video recordings for GMA must follow requirements for infant state, position and clothing and are scored by certified and trained assessors (9). Such trained GMA observers also have the expertise needed to ensure that video recordings fulfill the requirements for a valid GMA (9).

Access to trained observers using the GMA in hospital-based follow-up programs is limited by geographical constraints and lack of GMA expertise (10). As health care and parents move into the digital age using smartphones to share videos via internet, opportunities to perform remote GMA have developed. Recently, the Baby Moves smartphone app was presented for remote GMA within research settings (10, 11). However, smartphone apps for health data capturing in clinical settings are rarely assessed and usability tested (12). To be feasible in a clinical follow-up setting, home-based video recordings must fulfill basic GMA requirements without the need for comprehensive parental training or guiding.

Video recordings by hand-held smartphones introduce movement artifacts in the camera. Computer-based methods for objective detection of infant GMs (13, 14) may be jeopardized by such artifacts. Our research group has recently presented a machine-learning model which predicted CP with high accuracy (sensitivity of 92%, specificity of 81%) performed by clinician using a stationary camera, comparable to observational GMA (15). Important shortcomings of the method were the need for manual and time-consuming body point annotations, as well as the need for a stationary camera. Hence, an automated 7-point body tracker has been developed by our group and needs to be validated on recordings taken with hand-held cameras.

Provided that GMs can be assessed, and computer-based infant body point tracking can be performed on videos taken with a hand-held camera, it is possible to perform remote GMA as well as automated infant body point tracking for a computer-based model for the prediction of CP. Thus, the In-Motion instructional video has been developed so that parents can perform home-based videos with quality standards feasible for remote GMA and automated infant body point tracking. Feasibility of the In-Motion instructional video was assessed in a multi-site study including families of high-risk infants from Norway, Denmark and Belgium.

The main aims of the study are as follows: 1) To determine whether videos taken by parents with a hand-held camera were in accordance with the standards set in the instructional video, and whether the videos could be scored by a trained GMA observer. 2) To assess the accuracy of a 7-point body tracker software based on the same recordings. 3) To describe parents' perceptions of the instructional video and filming their baby in a home environment.

## 2. METHODS

### Design

Multi-center prospective observational study.

### Patient and public involvement

The study protocol including the parental survey content was developed and designed collaboratively with representatives from The Norwegian Cerebral Palsy organization and The Norwegian Premature Association.

### Participants

Parents of infants admitted to one of five participating level III-IV Neonatal Infant Care Units (NICU) in Norway (three hospitals including 13, 11 and 4 families, respectively), Denmark (one hospital including 43 families) and Belgium (one hospital including 15 families) from 2018-2019 (12 months recruitment period) were consecutively recruited at referral to the hospital follow-up program before discharge from the NICU. Families were recruited based on willingness to participate and the infant being evaluated as at high-risk of CP. In Norway and Denmark inclusion criteria were (a) Birth weight (BW)  $\leq 1000$  g (extremely low birth weight (ELBW) and/or gestational age (GA)  $< 28$  (extremely low GA (ELGA)), (b) neonatal arterial ischemic stroke, (c) neonatal encephalopathy, (d) other significant risk factors. In Belgium, only infants with GA  $< 32$  weeks or with perinatal stroke were included.

### Data collection procedure

Included participants were assisted by a research physiotherapist/pediatrician at the time of inclusion to download and install the In-Motion-App by smartphone, containing the instructional video from Google Play or iTunes. They could ask any questions about the app and how to manage the software. They got information about the time window for performing two separate video recordings for their infant between  $12^{+1}$ -  $13^{+6}$  and  $14^{+1}$ -  $17^{+6}$  weeks post term age (PTA) (11). The time points were defined to ensure GM videos from the fidgety movement's period. If no videos were returned from the families before  $17^{+6}$  weeks PTA, the local study coordinator contacted the family by phone to ask the reason why they had not uploaded any videos. The app was linked to a secure online server hosted at St. Olavs Hospital in Trondheim, Norway, and was available for i-operating system (iOS) and Android. After the end of the second time window, the families were contacted by email with a link to an online Norwegian University of Science and Technology survey to collect information about their opinions using the app and the In-Motion instructional video.

### The In-Motion-App and instructional video

The In-Motion-App and instructional video was designed by GMA trained personnel (LA, TF, RS, SO) at St. Olavs Hospital in Trondheim, Norway, for parents to give basic insight into recording standards needed for GMA and lighting and stability of camera. It was made as a short animation with simple drawn sequences containing a minimum of text. The instructional video was deployed to the parents by downloading the In-Motion-App developed for this study, and videos could be uploaded to be remotely assessed by a trained GMA observer.

After downloading the app and getting basic information from the local study coordinator, parents logged into the app with a username and a password. They typed in the first name of their child and the expected date of delivery (due date). The In-Motion-App generated two separate time windows between  $12^{+1}$ -  $13^{+6}$  and  $14^{+1}$ -  $17^{+6}$  weeks PTA (11) and visualized them in a graphical timeline to show when videos should be taken. A red dot illustrated today's date placed on the timeline, helping parents to plan when to perform the video recordings. In addition, a pop-up message reminded parents to prepare for videos a week before the beginning of each time window (11). The In-Motion-



1  
2  
3 App was constructed in such a way that the video recording automatically stopped after 3 minutes  
4 and asked the parents whether to upload the video or not.

5  
6 The instructional video was 2 minutes and 47 seconds long. Before taking videos, parents were  
7 told to look through the In-Motion instructional video which was available from the app menu. They  
8 could watch the video as many times as they wanted until they felt confident performing the  
9 recording. The main themes aimed at ensuring quality standards for remote GMA included: a) clothing  
10 of infant (just a diaper or a onesie), b) surface/underlay for infant (single-color blanket or rug), c)  
11 lighting (enough light avoiding sidelight that can cause shadows), d) state of infant (awake, alert,  
12 content, not disturbing baby, no pacifier), e) positioning (baby on floor- stand next to the baby's feet,  
13 whole body must be visible) and f) length of video (3 minutes). In addition, instructions were provided  
14 about how to keep the smartphone steady and ensure that the whole infant body was observable in  
15 the video image. Examples of some of the In-Motion instructional video themes are shown in Figure  
16 1. Parents were asked to consecutively upload videos to the server at St. Olavs Hospital in Norway.  
17  
18  
19

### 20 **Assessment of video quality for remote GMA**

21 Videos were assessed by a certified GMA observer with respect to the following standards (9): 1) *GMA*  
22 *standards*: active movements (not hypokinetic), supine position, correct state, adequate clothing  
23 (diaper or a onesie), no disturbances during recording. 2) *Additional In-Motion standards*: adequate  
24 light, whole body visible, feet of parent visible in video (ensuring correct position of smartphone  
25 camera, see picture to the right in Figure 1) and camera stability. Based on these standards, a  
26 classification was made by the same certified GMA observer as either "GMA scorable" if all standard  
27 criteria were fulfilled or "GMA non-scorable" if one or more standard criteria were inadequate. In  
28 addition, all videos were observed by the same GMA expert who also categorized yes/no whether  
29 the hand-held video had optimal stability, events of abrupt displacement, was predominantly  
30 unstable, whether an adequate underlay was used (firm, comfortable, large enough) and whether  
31 overall video image quality was sufficient (blurred/very blurred).  
32  
33  
34  
35

### 36 **Assessment of General Movements**

37 All videos classified as "GMA scorable" were consecutively assessed by one certified and experienced  
38 GMA observer that had passed advanced GMs courses under the General Movement Trust (LA). The  
39 use of one observer was chosen due to the study design not focusing on GMA and prediction of  
40 outcome. The observer had no knowledge about the infant's clinical history. According to Prechtl's  
41 method of assessment of general movements (9), fidgety movements were classified as continuous  
42 (FM++), intermittent (FM+), sporadic (FM+/-), abnormal (Fa) or absent (FM-).  
43  
44  
45

### 46 **In-Motion body point tracking**

47 The infant motion tracker algorithm consists of a convolutional neural network trained on 7-body  
48 points on 14900 video frames on high-risk infants that had participated in another study from our  
49 group (8). For further technical details of the previous trained convolutional neural net, the reader is  
50 referred to Groos et al (16). To evaluate the infant motion tracker, 5493 video frames was selected  
51 from a subset of 66 videos from 36 infants, recorded by the In-Motion-App by September 19<sup>th</sup> 2018.  
52 Eighty percent out of the selected 5493 frames were selected by random. The other 20% were  
53 selected manually in order to include body part occlusions (for example right wrist occluded behind  
54 left wrist) that may be challenging to track. The performance of the infant motion tracker was  
55 assessed and reported by the following three steps: First, the automatic motion tracking was  
56 performed to detect the position of 7-body points (nose, thorax (center between shoulders), wrists,  
57 pelvis, and ankles) in each of the 5493 video frames. Secondly, all 7 body points in the 5493 selected  
58 video frames was manually annotated. These manually annotations are the ground truth for the  
59  
60

1  
2  
3 evaluation of the infant motion tracker. Thirdly, the performance of the infant motion tracker is  
4 reported as percentage of points within a circular area centered at the manually annotated body  
5 point for the 5493 frames. In accordance with the established metric for evaluating pose-estimation  
6 (17), radius of the circular area was set to 10% of the infant head size and was normalized to adjust  
7 for different scaling (i.e., video zoom) (Figure 2).  
8  
9

### 10 **Survey**

11 Parents' opinions about the In-Motion-App and instructional video were collected using SelectSurvey  
12 v.4 software (ClassApps Inc., [www.classapps.com](http://www.classapps.com)) in Norway, operated by Norwegian University of  
13 Science and Technology (NTNU). In Denmark, parents' opinions were collected using Smart Trails data  
14 management software (MEDEI ApS. [www.medei.dk](http://www.medei.dk)) and in Belgium the survey was collected by post.  
15 The survey was sent to the families by a link in an email within one week after the last video was  
16 returned. The survey questions were customised for the In-Motion-App based on a tool developed by  
17 Jin and Kim in 2015 (18) and a survey used in a similar study on the Baby Moves App (11). It contained  
18 questions based on forced-choice questions covering the themes; 1) In-Motion-App, 2) In-Motion  
19 standards for remote GMA and 3) parental worries. A statement was made, and the parents indicated  
20 agreement or disagreement with the statement on a 5-point scale (Appendix S1, supplementary  
21 information).  
22  
23  
24  
25

### 26 **Data analysis**

27 Data were analyzed using SPSS statistics version 26.0 (IBM SPSS Statistics, Chicago, IL). The data are  
28 presented as numbers with proportion (%) or mean with standard deviation (SD) and range.  
29 Differences between infants with returned and no returned videos were analyzed using the Mann-  
30 Whitney U Test for continuous variables and Chi-square test and Fisher's Exact test for dichotomous  
31 variables. The accuracy of the 7-point body tracker was presented as the distribution of body point  
32 detections relative to the manually annotated body points, where 10% of the infant head size was  
33 used as a threshold.  
34  
35

## 36 **3. RESULTS**

37  
38 In total, 86 infants/families were recruited and 17 (19.8%) out of them did not submit any video (Figure  
39 3), leaving 69 families with 130 videos for analysis.  
40  
41

42 Twenty-eight (32.6%) families were included from three different hospitals in Norway, 43 (50%) from  
43 one hospital in Copenhagen, Denmark and 15 (17.4%) from one hospital in Gent, Belgium.  
44 Infant/family characteristics are shown in table 1.  
45  
46  
47  
48  
49  
50  
51  
52  
53  
54  
55  
56  
57  
58  
59  
60

**Table 1** Summary of infant/family characteristics

|                                                           | Total N (%)<br>(n=86) | N (%) video<br>responders (n=69) | N (%) no<br>video<br>responders<br>(n=17) | p-<br>value |
|-----------------------------------------------------------|-----------------------|----------------------------------|-------------------------------------------|-------------|
| <b>Demographics</b>                                       |                       |                                  |                                           |             |
| Boys, n (%)                                               | 51(59.3)              | 42(60.9)                         | 9(52.9)                                   | 0.32        |
| BW, mean (SD), grams                                      | 1952(1107)            | 1915(1124)                       | 2105(1055)                                | 0.67        |
| GA, mean (SD), weeks                                      | 32.4(5.3)             | 32.3(5.4)                        | 33.4(4.7)                                 | 0.43        |
| <b>Risk group</b>                                         |                       |                                  |                                           |             |
| Birth weight (BW) ≤1000 g and/or gestational age (GA) <28 | 25(29.1)              | 20(29)                           | 5(29.4)                                   | 0.77        |
| Neonatal arterial ischemic stroke                         | 11(12.8)              | 4(5.8)                           | 7(41.2)                                   | 0.001       |
| Hypoxic ischemic encephalopathy                           | 20(23.3)              | 17(24.6)                         | 3(17.6)                                   | 0.06        |
| Others                                                    | 32(37.2)              | 27(39.1)                         | 5(29.4)                                   | 0.38        |
| Infant families<br>(n=63)                                 |                       |                                  |                                           |             |
| <b>Socio-demographic data*</b>                            |                       |                                  |                                           |             |
| Mother relation (survey), n (%)                           |                       | 48(76.2)                         |                                           |             |
| Married/cohabitant family, n (%)                          |                       | 59(93.7)                         |                                           |             |
| Age mother/farther, mean (SD, range)                      |                       | 31.8(5.5,21-6)                   |                                           |             |
| Age farther, mean (SD, range)                             |                       | 33.9 (6.9, 22-59)                |                                           |             |
| Single child, n (%)                                       |                       | 32 (51.6)                        |                                           |             |
| <b>iOS vs. Android</b>                                    |                       |                                  |                                           |             |
| iOS users, n (%)                                          |                       | 41(65.1)                         |                                           |             |

### 3.1 Video recordings

Two (1.5%) out of 130 videos were shorter than 3 minutes (1 minute and 12 seconds and 2 minutes and 17 seconds). The mean PTA at video recording was 14.5 weeks (SD 2.28, range 8.1-23.6 weeks).

Fifteen (11.7%) families returned one recording, 49 (71%) two recordings, 4 (5.8%) three recordings, and 1 (1.4%) six recordings. One-hundred and seventeen (90%) videos were returned within the expected time window between 12<sup>+1</sup> - 17<sup>+6</sup> weeks PTA. Two (1.5%) families returned 2 and 3 videos, respectively, which were all taken outside the time window (week 8, 10, and 21 and 23, respectively). Eleven families (8.5%) with videos from within the requested time window, had additional videos taken outside the expected time windows. Six videos from one family were taken at two different days; four videos in weeks 12 and two videos in week 14 PTA.

### 3.2 Remote General Movement Assessment

Among the six videos returned from one family, the first one from each of the two days was selected for GMA analysis. Exclusion of the remaining 4 videos and additional 4 videos excluded due to PTA outside of the age required for assessment of FMs gave a total of 122 videos available for quality assessment.

One hundred and twenty-one (99%) out of 122 videos which were returned within the required time window were classified as GMA scorable. The video that was non-scorable had infant in side lying position. Details about compliance to the In-Motion standards are shown in Table 2.

**Table 2** Compliance to In-Motion standards (n= 126)

|   | Active movements (not hypokinetic) | Supine position   | Correct state       | No disturbances during recording | Adequate clothing       | Adequate light | Whole body visible | Feet of parents visible |
|---|------------------------------------|-------------------|---------------------|----------------------------------|-------------------------|----------------|--------------------|-------------------------|
| N | 126 (100)                          | 125 (99.2)        | 122 (96.8)          | 124 (98.4)                       | 125 (99.2)              | 124 (98.4)     | 124 (98.4)         | 116 (92.1)*             |
|   |                                    | Optimal stability | Abrupt displacement | Predominantly unstable           | Correct base of support |                | Image quality      |                         |
|   |                                    |                   |                     |                                  |                         | Clear          | Blurred            | Very blurred            |
| N |                                    | 80 (63.5)         | 26 (20.6)           | 22 (17.5)                        | 119 (94.4)              | 114 (90.5)     | 11 (8.7)           | 1 (0.8)                 |

\*3 missing data.

### 3.3 General Movement Assessment

Of the 121 videos classified as GMA scorable, 3 (2.4%) videos were classified with exaggerated (Fa), 3 (2.4%) with absent (FM-), and 7 (5.6%) with sporadic (FM+/-) FMs. Eighty-seven (69%) and 21 (16.7%) videos were classified with intermittent (FM+) and continuous (FM++) FMs, respectively.

### 3.4 Computer-based body point tracking

The proportion of correctly predicted left wrist key point from 5493 tested video images was 83.15%. Details of accuracy of 7 predicted body points and mean value for all points are shown in Figure 2.

### 3.5 Parent responses

Survey responses were received from 64 (92.8%) families of the 69 families who returned at least one video. Fifty-four (84.3%) of them observed the instructional video one or two times before filming their baby. No families returned a video without training on filming their baby first.

The majority of the survey respondents found the In-Motion-App easy to use. All respondents agreed or strongly agreed that it was easy to understand how to stand and hold the smartphone during the filming. Details about family responses are shown in Table 3. Fifty-seven (90.5%) families strongly disagreed, disagreed or neither disagreed nor agreed that they did become more worried about their child's development through using the In-Motion instructions.

**Table 3** Parents' responses to the In-Motion-App and instructional video

|                                                                                                                | Strongly agree | Agree | Neither agree nor disagree | Disagree | Strongly disagree |
|----------------------------------------------------------------------------------------------------------------|----------------|-------|----------------------------|----------|-------------------|
| <b>In-Motion_App</b>                                                                                           |                |       |                            |          |                   |
| The In-Motion app was generally easy to use                                                                    | 58.7%          | 33.3% | 3.2%                       | 4.8%     | 0.0%              |
| It was easy to enter the information needed in the In-Motion app                                               | 46.0%          | 41.3% | 11.1%                      | 1.6%     | 0.0%              |
| The reminders about when the child should be filmed were helpful                                               | 44.4%          | 41.3% | 6.3%                       | 6.3%     | 1.6%              |
| The number of reminders about when the child should be filmed was suitable                                     | 25.4%          | 39.7% | 15.9%                      | 14.3%    | 4.8%              |
| There were no technical problems with uploading and sending the videos                                         | 55.6%          | 22.2% | 6.3%                       | 4.8%     | 11.1%             |
| <b>In-Motion standards for remote GMA</b>                                                                      |                |       |                            |          |                   |
| It was easy to understand how I should stand and hold the telephone during the filming                         | 60.0%          | 40.0% | 0.0%                       | 0.0%     | 0.0%              |
| It was easy to keep the telephone still while I was filming                                                    | 16.7%          | 46.7% | 30.0%                      | 6.7%     | 0.0%              |
| It was easy to do the filming without disturbing the child                                                     | 36.5%          | 42.9% | 9.5%                       | 11.1%    | 0.0%              |
| It was easy to understand how my child should be dressed when filmed                                           | 65.1%          | 33.3% | 0.0%                       | 1.6%     | 0.0%              |
| It was easy to understand how my child should be positioned and how the mat should be when I was going to film | 63.5%          | 28.6% | 4.8%                       | 3.2%     | 0.0%              |
| It was easy to follow the instructions about how the lighting should be during the filming                     | 36.5%          | 38.1% | 14.3%                      | 11.1%    | 0.0%              |
| Filming my child for 3 minutes went smoothly                                                                   | 39.7%          | 39.7% | 19.0%                      | 1.6%     | 0.0%              |
| <b>Parental worries</b>                                                                                        |                |       |                            |          |                   |
| I felt safe about uploading video of my child                                                                  | 63.5%          | 27.0% | 7.9%                       | 1.6%     | 0.0%              |
| I became more worried about my child's development through using the In-Motion app                             | 1.6%           | 7.9%  | 28.6%                      | 22.2%    | 39.7%             |
| Using the In-Motion app made me more attentive to my child's development                                       | 7.9%           | 36.5% | 46.0%                      | 4.8%     | 4.8%              |

## DISCUSSION

In this study, more than 95% of families with high-risk infants filming their baby at home, returned at least one video that was in accordance with the In-Motion standards for remote GMA. Most families found the In-Motion-App easy to use and the instructions for filming easy to follow, and less than 10% of respondents became worried through using the In-Motion-App. Despite the use of hand-held smartphones introducing movement artifacts in the video image, our computer-based 7-point body tracker detected positions of the body points with high accuracy. To the best of our knowledge, this is the first automatic infant body point tracker that is tested on video recordings from hand-held smartphones.

This study has several strengths. First, it included families of high-risk infants frequently seen in NICU follow-up settings. We argue that this makes our findings robust and generalizable to comparable clinical settings. Second, the communication of In-Motion standards through a simple and short animated video, makes the instructions easily applicable to a broad range of different clinical settings. Furthermore, the accuracy of the 7-point body tracker software with the use of smartphone videos makes it pioneering in the field of automatic and markerless infant motion capture compared to other studies (19, 20). This facilitates further development of methods for early automated detection of CP based on smartphone videos. Finally, the design of the study using an experienced and certified GMA observer for evaluation of video quality and a survey with very high response rate, makes the study quality high and the results trustworthy.

There are also several limitations. First, almost 20% of the included families did not return any video. This study was not designed to evaluate reasons for not recording or returning videos. We can, therefore, only conclude on the quality of returned videos. The questions in our survey may also have limitations, mainly covering topics favorable to participants returning videos, participating in follow-up and smartphone usage, giving little or reduced information about responders with low mobile health technology usage. Hence, problems encountered by families who did not record or return any video need to be further explored. Our findings are in accordance with the study by Kwong et al (11), where 24% of families did not return any video using the Baby Moves App. These findings indicate that home-based video recordings for remote GMA is not a solution for all families and that it might be difficult in a clinical setting to know beforehand which families will return a video or not. Furthermore, 13 (19%) families returned one or several videos outside the required time window needed for a valid GMA. More than 90% of respondents found the reminders in the App helpful, but one fifth disagreed that the number of reminders were appropriate. These findings indicate a limitation in the design of the app reminders and lack of programmed filming windows parameters. These app functionalities need to be improved in a process involving the users.

Second, our study comprised five different hospital sites in three different countries, and information provided to families when downloading the App may have differed. Additionally, there is a risk that the research personnel could have given more information and assistance to families than will be common in an ordinary clinical setting. Our study setting could therefore be in slight contrast to an ordinary clinical setting, where adapted and flexible family information is needed due to challenges in reduced participation in neurodevelopmental follow-up (21) and racial and socioeconomic differences in mobile health technology usage (22).

Third, even though almost 20% of the hand-held videos in our study were classified as predominantly unstable, the GMA expert considered the videos to be GMA scorable. There is a risk that more videos might have been classified as non-scorable by another GMA observer with less training and experience or if there had been several GMA experts observing the same videos. To the best of our knowledge, there is only one study protocol planning to assess the predictive validity of

1  
2  
3 GMA from videos taken with hand-held smartphones for CP outcome (10). Hence, further studies on  
4 the use of smartphones for GMA are needed.

5  
6 Finally, our computer-based 7-point body tracker showed accurate estimations compared to  
7 manual annotations on the video image. However, further studies must explore how selection of body  
8 points, tracked body point accuracy and movement artifacts in camera will influence a machine-  
9 learning model for prediction of CP from smartphone video recordings.

10  
11 This study facilitates and contributes to the use of smartphone technology for video  
12 recordings and remote GMA. Consequently, it will contribute to giving high-risk infants and their  
13 families equal access to GMA as an accurate method for early identification of CP, without  
14 geographical constraints. The use of early remote medical assessment will improve the organization  
15 and resources used in follow-up screening at hospitals and have the potential to reduce medical  
16 complications for children with CP due to early detection. A clinical feasible computer-based  
17 movement analysis with equal accuracy as GMA, will greatly reduce the need for specialized GMA  
18 observers and provide an innovative resource-effective diagnostic measure.

### 20 21 **Acknowledgements**

22 We would like to thank all the families that participated in this study. We acknowledge the support  
23 from St. Olavs Hospital, The Liaison Committee between the Central Norway Regional Health  
24 Authority and the Norwegian Open AI-Lab, Norwegian University of Science and Technology,  
25 Trondheim, Norway. Thanks also to Mia Ortvad Bjerager consultant neonatologist and the Neonatal  
26 Ward staff at Nordsjællands Hospital in Denmark for their valuable contribution to this study.

### 28 29 **Contributors**

30 Conceptualization; LA, RS, HP, OMS, TF, SO, WS, BE, CB, Data curation; LA, RS, EI, DG, Formal analysis;  
31 LA, RS, EI, DG, Funding acquisition; LA, RS, Methodology; LA, RS, EI, DG, TF, SO, Project administration;  
32 LA, BE, HP, AP, AB, CB, RS, KD, Resources; LA, TF, SO, AB, AP, HP, OMS, BE, WS, KD, Writing-original  
33 draft; LA, RS, EI, DG, Writing-review & editing; LA, RS, EI, DG, TF, SO, BE, WS, AB, AP, CB, HP, OMS, KD.

### 35 36 **Funding**

37 This work was supported by grants from St. Olavs Hospital, Trondheim, Norway and The Liaison  
38 Committee between the Central Norway Regional Health Authority and the Norwegian University of  
39 Science and Technology, Trondheim, Norway (SO: 90056100). In Denmark the study was supported  
40 by grants from Nordsjællands Hospital, University Hospital of Copenhagen, Hillerød (PSP E-20231-18-  
41 01).

### 43 44 **Competing interests**

45 None declared.

### 46 47 **Patient consent**

48 Obtained in all participants.

### 49 50 **Ethics approval**

51 All infant/families provided written informed consent and ethics was approved by the regional  
52 committee for medical and health research ethics (REC Central-Committee 2017/913) in Norway. The  
53 study sites in Denmark and Belgium also had approvals from their local Institutional Review boards.  
54 Study registration in ClinicalTrials.gov Protocol Record 2017/913.

### 56 57 **Provenance and peer review**

58 Not commissioned; external peer reviewed.

### Data availability statement

No data are available. Data from this study are not available for sharing due to ethical approval requirements. Researchers interested in collaboration should contact the corresponding author with their expression of interest.

### Open Access

This is an Open Access article distributed in accordance with the Creative Commons Attribution Non-Commercial (CC BY-NC 4.0) license, which permits others to distribute, remix, adapt, build upon this work non-commercially, and license their derivative works on different terms, provided the original work is properly cited and the use is non-commercial. See: <http://creativecommons.org/licenses/by-nc/4.0/>

### REFERENCES

1. Granild-Jensen JB, Rackauskaite G, Flachs EM, Uldall P. Predictors for early diagnosis of cerebral palsy from national registry data. *Dev Med Child Neurol*. 2015.
2. Hubermann L, Boychuck Z, Shevell M, Majnemer A. Age at Referral of Children for Initial Diagnosis of Cerebral Palsy and Rehabilitation: Current Practices. *J Child Neurol*. 2016;31(3):364-9.
3. Novak I, Morgan C, Adde L, Blackman J, Boyd RN, Brunstrom-Hernandez J, et al. Early, Accurate Diagnosis and Early Intervention in Cerebral Palsy: Advances in Diagnosis and Treatment. *JAMA Pediatr*. 2017;171(9):897-907.
4. Dorner RA, Boss RD, Burton VJ, Raja K, Lemmon ME. Parent preferences for neurodevelopmental screening in the neonatal intensive care unit. *Dev Med Child Neurol*. 2020.
5. Kwong AKL, Fitzgerald TL, Doyle LW, Cheong JLY, Spittle AJ. Predictive validity of spontaneous early infant movement for later cerebral palsy: a systematic review. *Dev Med Child Neurol*. 2018;60(5):480-9.
6. Bosanquet M, Copeland L, Ware R, Boyd R. A systematic review of tests to predict cerebral palsy in young children. *Developmental Medicine and Child Neurology*. 2013;55(5):418-26.
7. Darsaklis V, Snider LM, Majnemer A, Mazer B. Predictive validity of Prechtl's Method on the Qualitative Assessment of General Movements: a systematic review of the evidence. *Dev Med Child Neurol*. 2011;53(10):896-906.
8. Stoen R, Boswell L, de Regnier RA, Fjortoft T, Gaebler-Spira D, Ihlen E, et al. The Predictive Accuracy of the General Movement Assessment for Cerebral Palsy: A Prospective, Observational Study of High-Risk Infants in a Clinical Follow-Up Setting. *J Clin Med*. 2019;8(11).
9. Einspieler C, Prechtl HF, Bos A, Ferrari F, Cioni G. Prechtl's method on the qualitative assessment of general movements in preterm, term and young infants. London: Mac Keith Press; 2004.
10. Spittle AJ, Olsen J, Kwong A, Doyle LW, Marschik PB, Einspieler C, et al. The Baby Moves prospective cohort study protocol: using a smartphone application with the General Movements Assessment to predict neurodevelopmental outcomes at age 2 years for extremely preterm or extremely low birthweight infants. *BMJ Open*. 2016;6(10):e013446.
11. Kwong AK, Eeles AL, Olsen JE, Cheong JL, Doyle LW, Spittle AJ. The Baby Moves smartphone app for General Movements Assessment: Engagement amongst extremely preterm and term-born infants in a state-wide geographical study. *J Paediatr Child Health*. 2018.
12. McCartney M. How do we know whether medical apps work? *BMJ*. 2013;346:f1811.
13. Marcroft C, Khan A, Embleton ND, Trenell M, Plotz T. Movement recognition technology as a method of assessing spontaneous general movements in high risk infants. *Frontiers Neurol*. 2015;5:1-9.
14. Cabon S, Poree F, Simon A, Rosec O, Pladys P, Carrault G. Video and audio processing in paediatrics: a review. *Physiol Meas*. 2019;40(2):02TR.



15. Ihlen EAF, Stoen R, Boswell L, Regnier RA, Fjortoft T, Gaebler-Spira D, et al. Machine Learning of Infant Spontaneous Movements for the Early Prediction of Cerebral Palsy: A Multi-Site Cohort Study. *J Clin Med*. 2019;9(1).
16. Groos D, Aurlien K. Infant Body Part Tracking in Videos Using Deep Learning-Facilitating Early Detection of Cerebral Palsy: NTNU; 2018.
17. Groos D, Ramampiaro H, Ihlen EAF. EfficientPose: Scalable single-person pose estimation. *Applied Intelligence*. 2020.
18. Jin M, Kim J. Development and Evaluation of an Evaluation Tool for Healthcare Smartphone Applications. *Telemed J E Health*. 2015;21(10):831-7.
19. Sciortino G, Farinella GM, Battiato S, Leo M, Distante C, editors. On the estimation of children's poses. *International Conference on Image Analysis and Processing*; 2017: Springer.
20. Hesse N, Bodensteiner C, Arens M, Hofmann UG, Weinberger R, Sebastian Schroeder A, editors. Computer vision for medical infant motion analysis: State of the art and rgb-d data set. *Proceedings of the European Conference on Computer Vision (ECCV)*; 2018.
21. J LO, McGinley JL, Fox LM, Spittle AJ. Challenges of neurodevelopmental follow-up for extremely preterm infants at two years. *Early Hum Dev*. 2015;91(12):689-94.
22. Hamilton EC, Saiyed F, Miller CC, 3rd, Eguia A, Fonseca AC, Baum GP, et al. The digital divide in adoption and use of mobile health technology among caregivers of pediatric surgery patients. *J Pediatr Surg*. 2018;53(8):1478-93.

Figure title – Figure 1

**Figure 1:** Screenshot of In-Motion instructional video showing examples of information about infant state, lighting and positioning of baby and person filming the baby.

Figure title – Figure 2

**Figure 2** Accuracy of 7 estimated body points compared with manually annotated images

Figure 2: From left: Table with proportions of correct detected body point; illustration of the computer-based detections according to 7 body points; the distribution of the left wrist body point detections (blue dots) relative to the manually annotated landmark (black dot) where 10% of the infant head size is used as a threshold (black circle).

Figure title and legend – Figure 3

**Figure 3** Flow chart of infant/families with reasons for non-upload of videos.



Figure 1: Screenshot of In-Motion instructional video showing examples of information about infant state, lighting and positioning of baby and person filming the baby.

209x44mm (300 x 300 DPI)

1  
2  
3  
4  
5  
6  
7  
8  
9  
10  
11  
12  
13  
14  
15  
16  
17  
18  
19  
20  
21  
22  
23  
24  
25  
26  
27  
28  
29  
30  
31  
32  
33  
34  
35  
36  
37  
38  
39  
40  
41  
42  
43  
44  
45  
46  
47  
48  
49  
50  
51  
52  
53  
54  
55  
56  
57  
58  
59  
60



Figure 2 Accuracy of 7 estimated body points compared with manually annotated images  
 Figure 2: From left: Table with proportions of correct detected body point; illustration of the computer-based detections according to 7 body points; the distribution of the left wrist body point detections (blue dots) relative to the manually annotated landmark (black dot) where 10% of the infant head size is used as a threshold (black circle).

209x68mm (300 x 300 DPI)



Figure 3 Flow chart of infant/families with reasons for non-upload of videos.

209x174mm (300 x 300 DPI)

## Appendix S1 – Parent survey

Thank you for taking the time to answer these questions. It takes about 10-15 minutes to answer them. If you have questions, you can contact ..., email ....., or mobile telephone .....

### 1. Are you the child's mother or father?

- Mother
- Father

### 2. What is your marital status?

- Single
- Married/cohabitant
- Separated/divorced
- Widow/widower

### 3. What is your age and is the age of your spouse/partner?

- You:
- Your spouse/partner:

### 4. How many brothers and sisters live with the child sometimes or always?

### 5. What type of mobile phone do you have?

- iPhone (iOS/Apple)
- Android

### 6. To what extent do you agree or disagree with each of these statements?

#### The In-Motion-App was generally easy to use

- Strongly disagree
- Disagree
- Neither agree nor disagree
- Agree
- Strongly agree

#### It was easy to enter the information needed in the In-Motion-App

- Strongly disagree
- Disagree
- Neither agree nor disagree
- Agree
- Strongly agree

#### The reminders about when the child should be filmed were helpful

- Strongly disagree
- Disagree
- Neither agree nor disagree
- Agree
- Strongly agree

1  
2  
3 **The number of reminders about when the child should be filmed was suitable**

- 4  Strongly disagree  
5  Disagree  
6  Neither agree nor disagree  
7  Agree  
8  Strongly agree  
9

10  
11 **There were no technical problems with uploading and sending the videos**

- 12  Strongly disagree  
13  Disagree  
14  Neither agree nor disagree  
15  Agree  
16  Strongly agree  
17

18  
19 **It was easy to understand how I should stand and hold the telephone during the filming**

- 20  Strongly disagree  
21  Disagree  
22  Neither agree nor disagree  
23  Agree  
24  Strongly agree  
25

26  
27 **It was easy to keep the telephone still while I was filming**

- 28  Strongly disagree  
29  Disagree  
30  Neither agree nor disagree  
31  Agree  
32  Strongly agree  
33

34  
35 **It was easy to do the filming without disturbing the child**

- 36  Strongly disagree  
37  Disagree  
38  Neither agree nor disagree  
39  Agree  
40  Strongly agree  
41

42  
43 **It was easy to understand how my child should be dressed when filmed**

- 44  Strongly disagree  
45  Disagree  
46  Neither agree nor disagree  
47  Agree  
48  Strongly agree  
49

50  
51 **It was easy to understand how my child should be positioned and how the mat should be  
when I was going to film**

- 52  Strongly disagree  
53  Disagree  
54  Neither agree nor disagree  
55  Agree  
56  Strongly agree  
57  
58  
59  
60

1  
2  
3 **It was easy to follow the instructions about how the lighting should be during the filming**

- 4  Strongly disagree  
5  Disagree  
6  Neither agree nor disagree  
7  Agree  
8  Strongly agree  
9

10  
11 **Filming my child for 3 minutes went smoothly**

- 12  Strongly disagree  
13  Disagree  
14  Neither agree nor disagree  
15  Agree  
16  Strongly agree  
17

18  
19 **I felt safe about uploading video of my child**

- 20  Strongly disagree  
21  Disagree  
22  Neither agree nor disagree  
23  Agree  
24  Strongly agree  
25

26  
27 **I become more worried about my child's development through using the In-Motion-App**

- 28  Strongly disagree  
29  Disagree  
30  Neither agree nor disagree  
31  Agree  
32  Strongly agree  
33

34  
35 **Using the In-Motion app made me more attentive to my child's development**

- 36  Strongly disagree  
37  Disagree  
38  Neither agree nor disagree  
39  Agree  
40  Strongly agree  
41  
42  
43  
44  
45  
46  
47  
48  
49  
50  
51  
52  
53  
54  
55  
56  
57  
58  
59  
60

**STROBE 2007 (v4) Statement—Checklist of items that should be included in reports of *cohort studies***

| Section/Topic                | Item # | Recommendation                                                                                                                                                                       | Reported on page # |
|------------------------------|--------|--------------------------------------------------------------------------------------------------------------------------------------------------------------------------------------|--------------------|
| <b>Title and abstract</b>    | 1      | (a) Indicate the study's design with a commonly used term in the title or the abstract                                                                                               | 1                  |
|                              |        | (b) Provide in the abstract an informative and balanced summary of what was done and what was found                                                                                  | 2                  |
| <b>Introduction</b>          |        |                                                                                                                                                                                      |                    |
| Background/rationale         | 2      | Explain the scientific background and rationale for the investigation being reported                                                                                                 | 3                  |
| Objectives                   | 3      | State specific objectives, including any prespecified hypotheses                                                                                                                     | 3                  |
| <b>Methods</b>               |        |                                                                                                                                                                                      |                    |
| Study design                 | 4      | Present key elements of study design early in the paper                                                                                                                              | 3                  |
| Setting                      | 5      | Describe the setting, locations, and relevant dates, including periods of recruitment, exposure, follow-up, and data collection                                                      | 4                  |
| Participants                 | 6      | (a) Give the eligibility criteria, and the sources and methods of selection of participants. Describe methods of follow-up                                                           | 4                  |
|                              |        | (b) For matched studies, give matching criteria and number of exposed and unexposed                                                                                                  | na                 |
| Variables                    | 7      | Clearly define all outcomes, exposures, predictors, potential confounders, and effect modifiers. Give diagnostic criteria, if applicable                                             | 4-5                |
| Data sources/<br>measurement | 8*     | For each variable of interest, give sources of data and details of methods of assessment (measurement). Describe comparability of assessment methods if there is more than one group | 4-5                |
| Bias                         | 9      | Describe any efforts to address potential sources of bias                                                                                                                            | 5                  |
| Study size                   | 10     | Explain how the study size was arrived at                                                                                                                                            | 4                  |
| Quantitative variables       | 11     | Explain how quantitative variables were handled in the analyses. If applicable, describe which groupings were chosen and why                                                         | 6                  |
| Statistical methods          | 12     | (a) Describe all statistical methods, including those used to control for confounding                                                                                                | 6                  |
|                              |        | (b) Describe any methods used to examine subgroups and interactions                                                                                                                  | na                 |
|                              |        | (c) Explain how missing data were addressed                                                                                                                                          | na                 |
|                              |        | (d) If applicable, explain how loss to follow-up was addressed                                                                                                                       | na                 |
|                              |        | (e) Describe any sensitivity analyses                                                                                                                                                | na                 |
| <b>Results</b>               |        |                                                                                                                                                                                      |                    |



|                          |     |                                                                                                                                                                                                              |     |
|--------------------------|-----|--------------------------------------------------------------------------------------------------------------------------------------------------------------------------------------------------------------|-----|
| Participants             | 13* | (a) Report numbers of individuals at each stage of study—eg numbers potentially eligible, examined for eligibility, confirmed eligible, included in the study, completing follow-up, and analysed            | 6   |
|                          |     | (b) Give reasons for non-participation at each stage                                                                                                                                                         | 6   |
|                          |     | (c) Consider use of a flow diagram                                                                                                                                                                           | 6   |
| Descriptive data         | 14* | (a) Give characteristics of study participants (eg demographic, clinical, social) and information on exposures and potential confounders                                                                     | 7   |
|                          |     | (b) Indicate number of participants with missing data for each variable of interest                                                                                                                          | na  |
|                          |     | (c) Summarise follow-up time (eg, average and total amount)                                                                                                                                                  | na  |
| Outcome data             | 15* | Report numbers of outcome events or summary measures over time                                                                                                                                               | 6-7 |
| Main results             | 16  | (a) Give unadjusted estimates and, if applicable, confounder-adjusted estimates and their precision (eg, 95% confidence interval). Make clear which confounders were adjusted for and why they were included | na  |
|                          |     | (b) Report category boundaries when continuous variables were categorized                                                                                                                                    | na  |
|                          |     | (c) If relevant, consider translating estimates of relative risk into absolute risk for a meaningful time period                                                                                             | na  |
| Other analyses           | 17  | Report other analyses done—eg analyses of subgroups and interactions, and sensitivity analyses                                                                                                               | 6-7 |
| <b>Discussion</b>        |     |                                                                                                                                                                                                              |     |
| Key results              | 18  | Summarise key results with reference to study objectives                                                                                                                                                     | 7   |
| <b>Limitations</b>       |     |                                                                                                                                                                                                              |     |
| Interpretation           | 20  | Give a cautious overall interpretation of results considering objectives, limitations, multiplicity of analyses, results from similar studies, and other relevant evidence                                   | 7   |
| Generalisability         | 21  | Discuss the generalisability (external validity) of the study results                                                                                                                                        | 7-8 |
| <b>Other information</b> |     |                                                                                                                                                                                                              |     |
| Funding                  | 22  | Give the source of funding and the role of the funders for the present study and, if applicable, for the original study on which the present article is based                                                | 8   |

\*Give information separately for cases and controls in case-control studies and, if applicable, for exposed and unexposed groups in cohort and cross-sectional studies.

**Note:** An Explanation and Elaboration article discusses each checklist item and gives methodological background and published examples of transparent reporting. The STROBE checklist is best used in conjunction with this article (freely available on the Web sites of PLoS Medicine at <http://www.plosmedicine.org/>, Annals of Internal Medicine at <http://www.annals.org/>, and Epidemiology at <http://www.epidem.com/>). Information on the STROBE Initiative is available at [www.strobe-statement.org](http://www.strobe-statement.org).
