# Supplementary material for: In-Motion-App for remote General Movement Assessment: a multi-site observational study
Source: PubMed Central journal article supplement — BMJ Open. 2021 Mar 4;11(3):e042147. doi: 10.1136/bmjopen-2020-042147 (PMC7934716; doi:10.1136/bmjopen-2020-042147), 2021-03-04
Supplement: bmjopen-2020-042147supp001.pdf [file bmjopen-2020-042147supp001.pdf]

## Appendix S1 – Parent survey

Thank you for taking the time to answer these questions. It takes about 10-15 minutes to answer them. If you have questions, you can contact ..., email ....., or mobile telephone .....

### 1. Are you the child's mother or father?

- Mother
- Father

### 2. What is your marital status?

- Single
- Married/cohabitant
- Separated/divorced
- Widow/widower

### 3. What is your age and what is the age of your spouse/partner?

- You:
- Your spouse/partner:

### 4. How many brothers and sisters live with the child sometimes or always?

### 5. What type of mobile phone do you have?

- iPhone (iOS/Apple)
- Android

### 6. To what extent do you agree or disagree with each of these statements?

#### The In-Motion-App was generally easy to use

- Strongly disagree
- Disagree
- Neither agree nor disagree
- Agree
- Strongly agree

#### It was easy to enter the information needed in the In-Motion-App

- Strongly disagree
- Disagree
- Neither agree nor disagree
- Agree
- Strongly agree

#### The reminders about when the child should be filmed were helpful

- Strongly disagree
- Disagree
- Neither agree nor disagree
- Agree
- Strongly agree

**The number of reminders about when the child should be filmed was suitable**

- Strongly disagree
- Disagree
- Neither agree nor disagree
- Agree
- Strongly agree

**There were no technical problems with uploading and sending the videos**

- Strongly disagree
- Disagree
- Neither agree nor disagree
- Agree
- Strongly agree

**It was easy to understand how I should stand and hold the telephone during the filming**

- Strongly disagree
- Disagree
- Neither agree nor disagree
- Agree
- Strongly agree

**It was easy to keep the telephone still while I was filming**

- Strongly disagree
- Disagree
- Neither agree nor disagree
- Agree
- Strongly agree

**It was easy to do the filming without disturbing the child**

- Strongly disagree
- Disagree
- Neither agree nor disagree
- Agree
- Strongly agree

**It was easy to understand how my child should be dressed when filmed**

- Strongly disagree
- Disagree
- Neither agree nor disagree
- Agree
- Strongly agree

**It was easy to understand how my child should be positioned and how the mat should be when I was going to film**

- Strongly disagree
- Disagree
- Neither agree nor disagree
- Agree
- Strongly agree

**It was easy to follow the instructions about how the lighting should be during the filming**

- Strongly disagree
- Disagree
- Neither agree nor disagree
- Agree
- Strongly agree

**Filming my child for 3 minutes went smoothly**

- Strongly disagree
- Disagree
- Neither agree nor disagree
- Agree
- Strongly agree

**I felt safe about uploading video of my child**

- Strongly disagree
- Disagree
- Neither agree nor disagree
- Agree
- Strongly agree

**I become more worried about my child's development through using the In-Motion-App**

- Strongly disagree
- Disagree
- Neither agree nor disagree
- Agree
- Strongly agree

**Using the In-Motion app made me more attentive to my child's development**

- Strongly disagree
- Disagree
- Neither agree nor disagree
- Agree
- Strongly agree
